# Supplementary material for: Rai1 frees mice from the repression of active wake behaviors by light
Source: eLife. 2017 May 26;6:e23292. doi: 10.7554/eLife.23292 (PMC5464769; doi:10.7554/eLife.23292)
Supplement: Figure 1—source data 1. — For Figure 1 panels D-F and Figure 1—figure supplement 1 individual data are provided as well. DOI: http://dx.doi.org/10.7554/eLife.23292.003 [file elife-23292-fig1-data1.xlsx]

## Sheet: Fig1B
Average profiles of hourly activity values under LD12:12 and DD conditions
LD12:12	ZT [h]	Mean	SEM		Mean	SEM
WT	1	40.0876	0.511246	Het	37.479	0.336438
	2	56.9596	0.73564		26.985	0.288758
	3	61.8098	0.731394		32.064	0.293283
	4	56.3564	0.739671		30.348	0.326732
	5	50.9782	0.68063		29.175	0.35897
	6	39.1091	0.588276		22.783	0.319587
	7	29.4676	0.426274		20.383	0.255335
	8	21.3982	0.246525		15.596	0.216495
	9	19.4956	0.223558		13.517	0.184226
	10	22.7542	0.297548		15.863	0.215166
	11	32.5058	0.308982		19.632	0.328001
	12	31.0091	0.415747		25.512	0.307246
	13	20.7938	0.417346		8.641	0.0497394
	14	11.2713	0.326491		3.938	0.0595553
	15	6.86073	0.188794		2.641	0.041339
	16	5.96073	0.122925		1.438	0.027524
	17	4.49673	0.0563045		2.092	0.0325605
	18	3.99164	0.0414751		1.498	0.031546
	19	3.49091	0.0948995		0.679	0.0177279
	20	3.15055	0.0800389		1.044	0.0209408
	21	3.396	0.158825		0.669	0.0121457
	22	3.40582	0.0727933		0.578	0.0130836
	23	5.71091	0.101458		1.077	0.0296832
	24	10.5284	0.240189		2.936	0.0584615
DD	CT [h]	Mean	SEM		Mean	SEM
WT	1	32.3149	0.50062	Het	18.405	0.178466
	2	47.5113	0.946496		17.985	0.25705
	3	48.9436	0.935715		17.145	0.18137
	4	51.7942	0.864552		21.405	0.240364
	5	44.0705	0.707017		20.5	0.210919
	6	31.1007	0.476425		18.298	0.259106
	7	20.9618	0.270581		19.768	0.292601
	8	16.9909	0.235814		14.881	0.203627
	9	13.8196	0.266597		11.292	0.166588
	10	17.5658	0.25164		10.973	0.210387
	11	17.6007	0.221202		9.298	0.123307
	12	19.1531	0.258914		11.004	0.118908
	13	20.1349	0.465277		15.557	0.211462
	14	21.1538	0.655268		13.311	0.106247
	15	14.5985	0.313481		13.418	0.196902
	16	8.96727	0.159921		9.761	0.197649
	17	8.42727	0.122935		5.255	0.0812544
	18	6.59345	0.109877		4.389	0.0652402
	19	5.604	0.109572		3.976	0.0570447
	20	4.96364	0.0839751		2.734	0.0483705
	21	3.24764	0.0905281		1.912	0.0317691
	22	4.48364	0.075179		1.545	0.035796
	23	5.11418	0.0924608		1.951	0.0265788
	24	7.692	0.105161		3.267	0.0434019

## Sheet: Fig1C
Activity at L-to-D and D-to-L transitions [% of 24h mean activity under LD12:12]; 5min values
L-to-D	Het		WT			D-to-L	Het		WT
ZT[h]	mean	SEM	mean	SEM		ZT[h]	mean	SEM	mean	SEM
9.7967	3.739	3.1737	7.529	4.1772		21.7867	133.858	15.5893	106.175	10.7785
9.8767	10.022	8.3464	8.323	4.4058		21.8767	120.841	19.7856	110.406	18.2655
9.9567	2.299	1.5342	11.288	3.8413		21.9567	138.223	27.1274	121.822	10.5464
10.0467	2.563	1.2631	8.616	4.5439		22.0367	120.069	24.8676	134.261	16.8057
10.1267	1.021	0.7326	12.893	6.5188		22.1267	121.929	23.918	131.248	16.6752
10.2067	8.949	4.2268	24.543	9.3061		22.2067	137.83	23.3201	169.844	20.7597
10.2967	3.311	1.6163	23.065	6.9596		22.2867	137.434	20.4176	144.446	19.4901
10.3767	6.81	4.0316	29.295	11.1628		22.3767	92.652	11.9275	151.744	19.4235
10.4567	11.032	5.5249	37.551	9.0605		22.4567	136.925	19.2831	172.1	13.2087
10.5467	14.38	7.9271	17.386	4.9549		22.5367	142.65	16.1173	133.903	18.5402
10.6267	6.839	3.0834	21.618	7.3307		22.6267	160.741	24.1024	170.816	32.7301
10.7067	0.801	0.4427	40.734	10.1801		22.7067	164.031	22.2263	151.25	12.4816
10.7967	9.426	5.6881	38.722	13.6113		22.7867	160.94	23.9089	152.124	17.9006
10.8767	6.851	5.4868	40.499	11.9383		22.8767	178.622	27.2641	144.263	17.1231
10.9567	8.095	3.4878	41.98	11.8386		22.9567	155.897	18.7741	145.894	19.0681
11.0467	1.923	1.591	39.837	11.7851		23.0367	184.184	29.9497	133.917	14.2278
11.1267	4.206	1.9037	28.759	8.3786		23.1267	209.734	23.2279	135.275	25.7032
11.2067	4.234	2.695	25.905	9.8449		23.2067	181.632	19.6429	132.156	16.9375
11.2967	6.361	3.9529	36.738	14.7022		23.2867	188.063	20.5754	110.424	12.0129
11.3767	11.152	6.6086	21.332	8.9211		23.3767	200.349	22.8496	100.376	16.5432
11.4567	4.796	2.9003	26.006	7.9653		23.4567	200.621	15.9153	109.714	20.4313
11.5467	8.335	4.6329	28.719	7.379		23.5367	218.727	22.0176	124.102	14.5214
11.6267	9.943	5.0771	24.312	5.0189		23.6267	186.715	17.5671	146.676	20.1274
11.7067	10.94	5.0878	33.711	7.9856		23.7067	214.976	22.8565	141.451	19.1454
11.7967	9.392	4.3425	32.147	8.4844		23.7867	210.391	24.165	131.449	18.2229
11.8767	11.194	6.7014	34.314	9.2457		23.8767	196.233	21.9102	138.021	22.7122
11.9567	37.966	22.9316	38.712	13.6213		23.9567	198.702	28.0187	135.079	20.7193
12.0367	92.96	48.6395	65.039	17.045		0.0367	153.724	30.3494	140.564	20.4802
12.1267	218.51	64.8686	90.372	26.5174		0.1267	102.195	19.6841	147.921	22.7172
12.2067	393.116	66.1256	124.661	34.1995		0.2067	63.975	18.1233	142.994	15.3821
12.2867	455.639	65.8059	168.086	34.2732		0.2867	25.494	9.249	75.458	22.2967
12.3767	423.698	60.6101	206.531	36.8081		0.3767	19.29	10.931	62.424	20.7461
12.4567	394.191	62.9567	239.883	38.4806		0.4567	5.255	2.5523	56.145	18.4707
12.5467	364.82	58.4058	249.07	41.5088		0.5367	8.845	5.6156	43.678	16.0711
12.6267	359.895	58.9737	250.296	32.704		0.6267	7.718	4.5471	38.047	13.1906
12.7067	313.713	54.5256	207.166	31.0031		0.7067	1.643	0.9167	42.456	15.6485
12.7867	314.709	53.1586	208.555	28.6068		0.7867	3.504	2.7118	40.502	14.5149
12.8767	309.17	41.7888	155.066	11.9634		0.8767	4.672	2.8135	35.48	14.5138
12.9567	311.361	37.4314	161.086	13.4322		0.9567	12.937	6.8475	27.542	9.4121
13.0367	269.982	33.1086	178.565	15.3905		1.0367	13.653	8.3309	27.93	9.3188
13.1267	268.755	24.7512	177.134	24.2131		1.1267	14.608	10.5663	53.062	14.9136
13.2067	221.488	37.6785	202.249	32.7408		1.2067	21.957	9.9481	45.23	11.3381
13.2967	213.777	40.1391	208.947	29.9971		1.2867	14.148	5.1841	29.543	8.3484
13.3767	192.716	24.6693	232.015	17.993		1.3767	18.754	6.999	35.456	10.832
13.4567	203.132	38.3143	246.52	19.4978		1.4567	13.652	5.6694	39.64	9.5578
13.5467	164.724	32.7043	263.422	20.7518		1.5367	16.241	6.5411	53.991	17.2802
13.6267	180.025	25.168	296.56	27.5755		1.6267	14.561	5.8607	38.745	15.6743
13.7067	210.345	24.5825	285.177	30.4163		1.7067	17.457	8.9921	40.679	14.3806
13.7967	191.501	27.0037	248.938	32.7195		1.7867	14.21	5.8444	36.883	11.1682
13.8767	195.757	16.2634	265.986	26.2371		1.8767	25.33	14.8144	35.205	12.7002
13.9567	219.358	22.4338	266.547	35.7949		1.9567	15.37	6.5102	29.993	11.5962
14.0467	259.749	39.6306	284.719	26.535		2.0367	16.536	5.7871	22.293	10.2925
14.1267	243.705	17.7365	304.987	31.6567		2.1267	20.495	8.0936	23.009	10.5715
14.2067	222.11	12.4495	251.376	20.3286		2.2067	26.979	11.3547	40.342	11.1872

## Sheet: Fig1D
Activity during the rest phase during LD12:12 and DD [% of 24h mean activity under LD12:12]
WT	Animal1	Animal2	Animal3	Animal4	Animal5	Animal6	Animal7	Animal8	Animal9	Animal10	Animal11	Mean	SEM
Activity in Rest phase LD12:12; % of 24h mean activity in LD	32.7688	25.9342	52.2633	21.9733	25.1854	14.8103	21.3026	25.8343	48.0493	19.9592	39.6654	29.7951	3.6316
Activity in Rest phase DD (rho); % of 24h mean activity in LD	48.9255	22.4953	42.5901	24.8581	24.22	22.5145	46.5319	40.4884	31.9605	23.847	25.3235	32.1595	3.13988
Het	Animal1	Animal2	Animal3	Animal4	Animal5	Animal6	Animal7	Animal8	Animal9	Animal10	Animal11	Animal12	Mean	SEM
Activity in Rest phase LD12:12; % of 24h mean activity in LD	8.33357	24.3166	17.0035	10.7969	21.2008	24.3388	13.2199	15.3373	40.1999	15.2194	20.064	16.6462	18.8897	2.4054
Activity in Rest phase DD (rho); % of 24h mean activity in LD	24.7245	31.8731	18.1946	26.2291	30.4602	54.7405	19.2644	15.8074	31.7868	27.312	25.278	40.0813	28.8127	3.05424

## Sheet: Fig1E
Active phase (alpha) under LD12:12 and DD in [h]
Het				WT
LD12:12	DD	DD-LD12:12		LD12:12	DD	DD-LD12:12
		expansion				expansion
12.16	12.845	0.685		12.746	11.82	-0.926
12.25	14.717	2.467		12.246	12.18	-0.066
12.25	14.551	2.301		13.584	15.26	1.676
12.083	15.138	3.055		11.67	11.51	-0.16
12.084	14.534	2.45		11.67	11.66	-0.01
11.916	14.929	3.013		12	14.16	2.16
12.08	15	2.92		12.42	13.143	0.723
12	14.74	2.74		11.76	12.71	0.95
12.333	15.71	3.377		13.09	14.97	1.88
12.08	14.741	2.661		11.43	10.86	-0.57
12.167	14.62	2.453		13.84	11.54	-2.3
12.083	15.803	3.72			MEAN	0.305182
	MEAN	2.6535			SEM	0.403531
	SEM	0.215771

## Sheet: Fig1F
Phase shift after CT22 light pulse					Phase shift after CT16 light pulse
Het	Dphase [h]	WT	Dphase [h]		Het	Dphase [h]	WT	Dphase [h]
R500	1.22563	R502	0.752875		R500	-1.10189	R502	-3.54089
R501	1.28721	R503	0.541792		R501	-1.90244	R503	-1.26767
R506	1.2305	R507	0.733167		R506	-3.40122	R507	-2.564
R510	1.30208	R509	0.647833		R510	-2.08389	R509	-3.032
		R511	0.249875				R511	-2.834
Mean	1.26135		0.585108		Mean	-2.12236		-2.64771
SEM	0.0194847		0.0917222		SEM	0.476681		0.380242

## Sheet: Fig1_Supp
Activity during rest phase [% of 24 activity LD12:12]				Activity during rest phase [% of 24 activity LD12:12]
6.6cds/m2	WT	Het		0.6cds/m2	WT	Het
Animal1	34.6294	8.23911		Animal1	39.139	20.7274
Animal2	50.8776	4.61474		Animal2	56.7715	20.8081
Animal3	45.6411	9.38219		Animal3	33.1862	21.5636
Animal4	53.8769			Animal4	39.93
Animal5	41.6521			Animal5	71.5355
MEAN	45.3354	7.41201		MEAN	48.1124	21.0331
SD	7.61499	2.48902		SD	15.763	0.461264
SEM	3.40553	1.43703		SEM	7.04942	0.266311
Active phase LD12:12 [h]				Active phase LD12:12 [h]
6.6cds/m2	WT	Het		0.6cds/m2	WT	Het
Animal1	12.0833	12.25		Animal1	12.9167	12.3333
Animal2	12.5833	11.6667		Animal2	13.25	11.25
Animal3	12.25	12.0833		Animal3	12.6667	12.25
Animal4	12.0833			Animal4	11.8333
Animal5	12.5			Animal5	12.9167
MEAN	12.3	12		MEAN	12.7167	11.9444
SEM	0.104083	0.173472		SEM	0.239502	0.348055
