# Supplementary material for: Rai1 frees mice from the repression of active wake behaviors by light
Source: eLife. 2017 May 26;6:e23292. doi: 10.7554/eLife.23292 (PMC5464769; doi:10.7554/eLife.23292)
Supplement: Figure 2—source data 2. — For all panels individual data are provided as well. DOI: http://dx.doi.org/10.7554/eLife.23292.007 [file elife-23292-fig2-data2.xlsx]

## Sheet: Fig2A
Time course of time-spent-awake [min/h], in TDW [min/h], and levels of activity [movements/h] during LD12:12.
HET	WAKEFULNESS [min/h]							HET	TDW [min/h]							HET	ACTIVITY [movements/h]
ZT [h]	Animal1	Animal2	Animal3	Animal4	MEAN	SEM		ZT [h]	Animal1	Animal2	Animal3	Animal4	MEAN	SEM		ZT [h]	Animal1	Animal2	Animal3	Animal4	MEAN	SEM
0	27.7557	13.4887	32.711	13.7553	21.9277	4.9011		0	7.13333	2.48867	5.778	1.66667	4.26667	1.30458		0	1.53333	0.133333	0.0666667	2.13333	0.966667	0.515321
1	29.311	18.2887	18.533	18.2667	21.0998	2.73772		1	5.73333	2.15567	2.311	2.33333	3.13333	0.867567		1	0.666667	0.266667	0.133333	3.13333	1.05	0.703628
2	28.9337	13.6667	13.111	21.0223	19.1834	3.7166		2	6.8	2.15567	1.22233	3.06667	3.31117	1.22237		2	0	0.133333	0.533333	1.8	0.616667	0.410397
3	21.733	18.9113	23.289	18.4223	20.5889	1.15858		3	3.289	2.778	1.8	2.48867	2.58892	0.310686		3	0.133333	0.133333	0.533333	0.533333	0.333333	0.11547
4	23.5553	22.2667	8.44433	18.8443	18.2777	3.42517		4	3.73333	4.467	0.422333	2.06633	2.67225	0.902602		4	0	0.333333	0.2	1.13333	0.416667	0.248514
5	17.2443	15.6443	28.9333	20.889	20.6777	2.96258		5	2.711	2.57767	2.88867	3.33333	2.87767	0.164705		5	0.8	0.0666667	0.4	1.13333	0.6	0.232538
6	21.1557	35.889	9.667	18	21.1779	5.46974		6	2.53333	11.9557	0.578	1.733	4.2	2.61619		6	0	1	0.0666667	1	0.516667	0.279384
7	11.1777	13.6003	15.7777	17.0223	14.3945	1.28444		7	0.511333	1.04467	0.533333	1.622	0.927833	0.262142		7	0	0	0	0	0	0
8	25.1113	12.0223	16.378	20.578	18.5224	2.80608		8	3.467	0.6	1.44433	2.13333	1.91117	0.606016		8	0.133333	0	0.133333	0	0.0666667	0.03849
9	26.4887	24.422	21.7557	28.3557	25.2555	1.41643		9	2.422	3.511	1.711	3.66633	2.82758	0.463844		9	0.266667	0.533333	0.333333	0.333333	0.366667	0.057735
10	27.511	25.622	29.2443	27.5333	27.4777	0.739866		10	1.93333	2.95533	1.55567	3.111	2.38883	0.381236		10	0	0.4	0.133333	0	0.133333	0.0942809
11	33.9333	29.2	35.9777	34.4443	33.3888	1.46227		11	3.08867	3.57767	3.333	4.06667	3.5165	0.208794		11	1.26667	0.466667	0.6	1	0.833333	0.183586
12	59.6223	59.7557	56.911	60	59.0722	0.724648		12	16.311	34.622	16.2667	24.1553	22.8388	4.34341		12	33.9333	55.6667	42.2	34.8667	41.6667	5.01937
13	55.3333	51.9557	48.5997	56.111	52.9999	1.72183		13	11.889	21.489	12.7337	19.1777	16.3223	2.36961		13	19.8	25.3333	27.8667	17.8	22.7	2.34608
14	50.4447	53.4443	51.378	53.3777	52.1612	0.746442		14	10.8	19.3113	13.1777	18	15.3223	2.00277		14	18.2	20.6667	23.6667	18.4	20.2333	1.27381
15	54.822	50.5557	49.2667	58.6443	53.3222	2.13455		15	15.2223	20.4667	13.8	21.5777	17.7667	1.91533		15	15.8667	23.7333	24.4667	24.4667	22.1333	2.09603
16	54.8887	56.6	54.0443	59.6667	56.2999	1.24178		16	17.311	26.067	15.9333	23.689	20.7501	2.44839		16	19.8667	31.8667	28.8	27.9333	27.1167	2.55971
17	57.5113	46.2667	50.7777	55.2667	52.4556	2.49301		17	20.2	19.911	12.5553	22.9777	18.911	2.22849		17	17.7333	19.4	28.0667	26.6667	22.9667	2.5789
18	32.5557	46.6223	46.0447	40.1113	41.3335	3.27504		18	7.28867	14.7997	8.95567	12.1557	10.7999	1.67248		18	20.4	17.7333	12.7333	10.4667	15.3333	2.27075
19	39.422	34.6	40.733	44.889	39.911	2.11939		19	8.80033	10.489	4.8	11.8667	8.989	1.53064		19	12	11.6667	11	10.3333	11.25	0.369559
20	33.4223	47.689	40.4443	35.8447	39.3501	3.13795		20	8.55567	17.3113	3.26667	10.2443	9.8445	2.89889		20	12.8	19.6667	12.2667	10.5333	13.8167	2.00912
21	29	39.5333	46.5553	38.4667	38.3888	3.60737		21	3.978	11.889	4.33333	13.3777	8.3945	2.46715		21	19.9333	10.7333	16.2667	3.53333	12.6167	3.56966
22	41.0663	49.8667	53.4	44.489	47.2055	2.74655		22	10.2	25.4	11.4443	17.1333	16.0444	3.46447		22	24.0667	27.8	24.4	14.9333	22.8	2.75452
23	45.4667	50	51.1777	53.311	49.9888	1.6558		23	14.4	24.4	15.3557	21.911	19.0167	2.45075		23	24.6667	24.9333	27.6667	23.3333	25.15	0.908957
WT	WAKEFULNESS [min/h]							WT	TDW [min/h]							WT	ACTIVITY [movements/h]
ZT [h]	Animal1	Animal2	Animal3	Animal4	MEAN	SEM		ZT [h]	Animal1	Animal2	Animal3	Animal4	MEAN	SEM		ZT [h]	Animal1	Animal2	Animal3	Animal4	MEAN	SEM
0	24.033	28.7777	38.4667	18.622	27.4748	4.21047		0	5.2	9.59967	13.7777	6.82233	8.84992	1.87701		0	3.13333	14.4	14	12.2667	10.95	2.64636
1	40.3	33.4667	26.3333	33.2	33.325	2.85146		1	14.433	10.9777	8.15533	11.378	11.236	1.28447		1	5.8	22.1333	7.53333	18.5333	13.5	4.02865
2	14.8	27.4443	27.5333	17.733	21.8777	3.29452		2	1.3	9.289	5.24433	4.93333	5.19167	1.63306		2	1.8	21.2	3.86667	18.6	11.3667	4.97315
3	22.7	22.4663	31.2443	23.689	25.0249	2.09		3	3.7	6.93333	6.06633	5.66633	5.5915	0.6837		3	3.86667	5	5.86667	4.93333	4.91667	0.409494
4	28.5335	27.2	19.489	14.2	22.3556	3.37103		4	7.1335	8.13367	3.2	2.26667	5.18346	1.44188		4	0.466667	13.6	2.86667	11.0667	7	3.16052
5	14.1335	16.422	23.5113	22.289	19.089	2.26324		5	0.933	2.84433	4.2	6	3.49433	1.0708		5	3.33333	3.53333	5.46667	0.133333	3.11667	1.10466
6	44.167	34.911	18.689	13.3557	27.7807	7.13029		6	12.1335	10.5333	2.17767	2.55567	6.85004	2.61015		6	0.866667	23.6	0.933333	13.6	9.75	5.50221
7	11.867	18.067	27.8447	17.8667	18.9113	3.30695		7	0.8	3.26667	5.22233	2.889	3.0445	0.906195		7	0.533333	3.46667	4.6	3.4	3	0.867094
8	35.7335	16.6	27.8447	39.5777	29.939	5.07276		8	5.9665	3.04467	5.689	11.4223	6.53062	1.75849		8	5.66667	4.26667	5.66667	4.86667	5.11667	0.340343
9	17.1335	33.2887	25.7333	15.2443	22.85	4.16137		9	3.8335	7.44433	8.22233	2.44433	5.48612	1.39359		9	0.8	8.2	10.1333	31.2	12.5833	6.52331
10	26.2	18.8667	31.7557	33.4667	27.5723	3.29033		10	3.033	4.33333	8.53333	7.75533	5.91375	1.32445		10	3.86667	7.13333	11.7333	6.73333	7.36667	1.6272
11	40.3665	42.9553	35.711	44.5113	40.886	1.92518		11	12.1	10.3777	8.733	12.9557	11.0416	0.93783		11	7.4	21.4	16	21.6	16.6	3.32966
12	47.7335	49.267	46.9557	44.7777	47.1835	0.934675		12	18.8	18.933	15.7333	18.7777	18.061	0.776646		12	21.5333	51.8	30.6667	41.3333	36.3333	6.55343
13	60	59.1333	55.4	60	58.6333	1.09697		13	27.7335	24.8223	26.8	33.2667	28.1556	1.80853		13	50.3333	76.4667	58.7333	80.9333	66.6167	7.24157
14	60	57.6887	59.8223	54.889	58.1	1.1922		14	30.7665	23.289	30.733	30.5113	28.825	1.84619		14	46.0667	81.2667	57.1333	105.133	72.4	13.1549
15	60	59.7557	59.8223	60	59.8945	0.0624121		15	27.0665	29.6003	30.5557	35.9777	30.8	1.8763		15	56.2	98.6	44.9333	76.6	69.0833	11.8214
16	60	58.489	53.9333	59.9557	58.0945	1.43079		16	26.3	28.1337	25.3557	34.3333	28.5307	2.01835		16	48.0667	86	43	87.6667	66.1833	11.9719
17	49	44.7557	50.4	47.1333	47.8222	1.22169		17	18.7	16.6223	21.2887	26.4443	20.7638	2.12044		17	37.4667	30.2	41.1333	60.4667	42.3167	6.46245
18	57.1665	43.3557	38.289	32.0443	42.7139	5.34407		18	11.267	17.5557	13.422	13.0667	13.8278	1.32912		18	13.6	45.4	15.1333	71.5333	36.4167	13.8066
19	30.6	44.7557	46.4443	46.7333	42.1333	3.8691		19	3.1335	17.0667	16.9777	20.5557	14.4334	3.85765		19	23.8	27.6667	19	28.8667	24.8333	2.22469
20	50.1665	23	31.8003	24.2	32.2917	6.26871		20	16.0665	5.22233	9.53333	5.26667	9.02221	2.55647		20	1.53333	6.8	14.3333	66.7333	22.35	15.0258
21	34.733	47.2	38.4667	51.378	42.9444	3.83746		21	5.9	17.0443	12.9333	26.089	15.4917	4.21564		21	32.2667	38.2667	17.9333	35	30.8667	4.48215
22	38	37.1333	29.2443	31.178	33.8889	2.16696		22	6.2335	12.1553	7.2	11.1553	9.18604	1.45364		22	7	18.6667	10.0667	18.5333	13.5667	2.97278
23	48.633	36.5113	37.3333	45	41.8694	2.95567		23	15.4	13.689	10.6663	19.533	14.8221	1.85024		23	20.3333	27.9333	10.8	58.4	29.3667	10.2928

## Sheet: Fig2B
Time-spent-awake and in TDW during the 12h L- and 12 D-period under LD12:12 [h/12h]
HET	Wakefulness [h/12h]
	Animal1	Animal2	Animal3	Animal4	MEAN	SEM
Light	4.89851	4.05037	4.23037	4.28556	4.3662	0.184404
Dark	9.22592	9.78149	9.82221	10.003	9.70815	0.167791
WT	Wakefulnes [h/12h]
	Animal1	Animal2	Animal3	Animal4	MEAN	SEM
Light	5.33279	5.34109	5.56927	4.89592	5.28477	0.140719
Dark	9.93388	9.35076	9.13186	9.28816	9.42616	0.175385
HET	TDW [h/12h]
	Animal1	Animal2	Animal3	Animal4	MEAN	SEM
Light	0.722594	0.671117	0.392961	0.521456	0.577032	0.0747279
Dark	2.41593	4.1026	2.21037	3.60443	3.08333	0.45807
WT	TDW [h/12h]
	Animal1	Animal2	Animal3	Animal4	MEAN	SEM
Light	1.1761	1.44629	1.32036	1.28482	1.30689	0.0556838
Dark	3.45612	3.73557	3.68665	4.58296	3.86532	0.246848

## Sheet: Fig2C
activity expressed per unit of time spent awake [movements/h awake]
	HET	Animal1	Animal2	Animal3	Animal4	MEAN	SEM
	12h Light	2.49055	0.85589	1.13465	0.731137	1.30306	0.404718
	12h Dark	24.1999	29.5661	24.3598	27.9317	26.5144	1.33293
	WT	Animal1	Animal2	Animal3	Animal4	MEAN	SEM
	12h Light	27.5528	27.6972	15.9207	7.66624	19.7092	4.87097
	12h Dark	73.6067	62.9967	39.7363	38.5652	53.7262	8.69266

## Sheet: Fig2D
TDW as percentage of time-spent-awake (TDW*100/Wakefulness) [%]
HET	Animal1	Animal2	Animal3	Animal4	MEAN	SEM
12h Light	14.7513	16.5693	9.28906	12.1677	13.1943	1.58429
12h Dark	26.1864	41.9425	22.5038	36.0336	31.6666	4.45958
WT	Animal1	Animal2	Animal3	Animal4	MEAN	SEM
12h Light	22.0541	27.0786	23.7079	26.2426	24.7708	1.15479
12h Dark	34.7912	39.9494	40.3713	49.3419	41.1135	3.02193
