# Supplementary material for: Rai1 frees mice from the repression of active wake behaviors by light
Source: eLife. 2017 May 26;6:e23292. doi: 10.7554/eLife.23292 (PMC5464769; doi:10.7554/eLife.23292)
Supplement: Figure 4—source data 1. — For both panels individual data are provided as well. DOI: http://dx.doi.org/10.7554/eLife.23292.010 [file elife-23292-fig4-data1.xlsx]

## Sheet: Fig4A
Hourly time course of time-spent-awake [min/h], TDW [min/h], and locomotor activity [movements/h] during LD12:12 (baseline 24h), LL (48h), and subsequent LD12:12 (recovery 36h).															Light	Dark
	WAKEFULNESS [min/h]												TDW [min/h]												Activity [mvt/h]
	Genotype	Day	Hours	Animal 1	Animal 2	Animal 3	Animal 4		MEAN	SEM	ZT		Genotype	Day	Hours	Animal 1	Animal 2	Animal 3	Animal 4		MEAN	SEM	ZT		Genotype	Day	Hours	Animal 1	Animal 2	Animal 3	Animal 4		MEAN	SEM	ZT
	Het	1	0	20.733	13.8	35.933	9.8		20.0665	5.7508	0		Het	1	0	2.867	2.333	5	1.2		2.85	0.796481	0		Het	1	1	1.2	0	0	0.6		0.45	0.287228	0
		1	1	58.267	18.533	26.933	29.8		33.3833	8.63219	1			1	1	14.067	1.733	4.067	3.4		5.81675	2.79353	1			1	2	1.6	0.4	0.4	9.4		2.95	2.16852	1
		1	2	10.867	5.867	12.133	10.8		9.91675	1.3843	2			1	2	0.667	0.267	0.2	0.267		0.35025	0.106758	2			1	3	0	0	0	0		0	0	2
		1	3	23.333	19.6	19.267	26.2		22.1	1.64839	3			1	3	2.4	1.2	0.8	4.133		2.13325	0.748257	3			1	4	0	0	1	0.4		0.35	0.236291	3
		1	4	34.8	34.4	6.933	22.933		24.7665	6.55026	4			1	4	8.2	8.267	0.067	2.733		4.81675	2.04639	4			1	5	0	0.8	0.6	3.4		1.2	0.752773	4
		1	5	11.533	26.6	24.2	8.067		17.6	4.58482	5			1	5	0.533	6.6	0.533	0.4		2.0165	1.52815	5			1	6	0	0.2	0	0		0.05	0.05	5
		1	6	16.267	15.2	13.867	20.4		16.4335	1.41036	6			1	6	0.733	2.4	0.8	1.733		1.4165	0.399446	6			1	7	0	0	0	0		0	0	6
		1	7	15.133	15.667	14.733	15.8		15.3332	0.246584	7			1	7	0.467	1.2	0.267	1.533		0.86675	0.299227	7			1	8	0	0	0	0		0	0	7
		1	8	16.467	7.467	19.067	18		15.2502	2.64871	8			1	8	0.867	0	1.4	0.733		0.75	0.288528	8			1	9	0	0	0	0		0	0	8
		1	9	30.8	28.933	24.333	34.267		29.5832	2.06974	9			1	9	2.533	3.933	2	4.533		3.24975	0.590845	9			1	10	0.4	0	0.4	0		0.2	0.11547	9
		1	10	24.533	15.533	32.933	35.667		27.1665	4.54409	10			1	10	1	1.133	1	4.133		1.8165	0.772803	10			1	11	0	0	0.4	0		0.1	0.1	10
		1	11	31	27.2	37.267	34		32.3668	2.1456	11			1	11	1.8	0.933	3.533	4.333		2.64975	0.779036	11			1	12	1.8	0.2	0.2	0.6		0.7	0.378594	11
		1	12	59.8	60	53.133	60	Baseline	58.2332	1.70074	12			1	12	13.133	31.133	9.667	24.733	Baseline	19.6665	4.99856	12			1	13	24.4	50	59.6	27.4	Baseline	40.35	8.59161	12
		1	13	47.867	40.867	46.133	59.733		48.65	3.98284	13			1	13	7.133	9.8	8.667	17.6		10.8	2.3316	13			1	14	15.4	12	30.8	5.8		16	5.31852	13
		1	14	55.067	56.733	55.667	51.733		54.8	1.07881	14			1	14	10.933	17.6	10.8	15		13.5832	1.65609	14			1	15	14.2	21.6	25	22.4		20.8	2.31661	14
		1	15	48.933	40	43.6	57.933		47.6165	3.89772	15			1	15	12.467	8.8	9.6	19.2		12.5168	2.36273	15			1	16	13.6	9.2	24.8	22.2		17.45	3.64543	15
		1	16	47.133	50.467	52.133	59.733		52.3665	2.66642	16			1	16	8.6	17.867	11.067	21.933		14.8667	3.06382	16			1	17	11	22	29.8	13.4		19.05	4.29137	16
		1	17	55.667	60	59.267	60		58.7335	1.03666	17			1	17	14.467	30.4	16.733	28.933		22.6332	4.09786	17			1	18	24.8	34.4	37.6	22.6		29.85	3.63811	17
		1	18	42.867	38.8	58.867	33.667		43.5502	5.44145	18			1	18	9.933	5.133	16	7.667		9.68325	2.3226	18			1	19	38.8	5.2	13	14.8		17.95	7.25552	18
		1	19	39.333	35	38.133	48.4		40.2165	2.87667	19			1	19	5.667	8.867	0.267	13.133		6.9835	2.71122	19			1	20	11.8	13.4	14	10.6		12.45	0.771902	19
		1	20	28.2	52.933	44.467	26.2		37.95	6.45553	20			1	20	2.4	19.067	0.933	5.333		6.93325	4.14671	20			1	21	17	18.6	7.8	2.6		11.5	3.80307	20
		1	21	28.867	26.733	46.8	32		33.6	4.53098	21			1	21	2.6	3.267	4.533	10.6		5.25	1.82783	21			1	22	20	4.4	9.6	4		9.5	3.72514	21
		1	22	35.933	55.8	44.067	40.333		44.0333	4.25992	22			1	22	2.467	26.667	3.8	17.533		12.6167	5.7903	22			1	23	9	21.4	23.2	5.8		14.85	4.36606	22
		1	23	48.467	47.133	51.933	49.267		49.2	1.01175	23			1	23	13.067	17.933	14.267	18.933		16.05	1.41229	23			1	24	27.4	18	22.2	20.6		22.05	1.98221	23
		2	24	27	13.8	11.2	13.8		16.45	3.56966	0			2	24	4.4	2.467	1.333	1.067		2.31675	0.757856	0			2	1	0.4	0	0.4	1		0.45	0.206155	0
		2	25	33.467	13.933	10.733	9.2		16.8332	5.63155	1			2	25	5.867	1.6	0.467	0.267		2.05025	1.30566	1			2	2	0	0.2	0	5.2		1.35	1.2842	1
		2	26	23.467	43.133	25.8	33.933		31.5832	4.45568	2			2	26	3.933	10.6	1.4	7.267		5.8	2.00079	2			2	3	0	0.8	0.8	1.4		0.75	0.287228	2
		2	27	8.867	9.133	17.2	8.8		11	2.06792	3			2	27	0.2	0.4	1.133	0.467		0.55	0.202439	3			2	4	0.4	0.2	0	0		0.15	0.0957427	3
		2	28	32.067	16.4	7.133	46.067		25.4168	8.59387	4			2	28	4.867	0.4	0.2	11.533		4.25	2.65593	4			2	5	0	0	0.4	2.4		0.7	0.574456	4
		2	29	9.6	14.6	19.8	9.4		13.35	2.46357	5			2	29	0.267	0.733	1.4	0.6		0.75	0.237799	5			2	6	0	0	0	0		0	0	5
		2	30	21.067	9.6	14.067	16.733		15.3667	2.4032	6			2	30	1.333	0.333	0.533	1.2		0.84975	0.245555	6			2	7	0	0	0	0		0	0	6
		2	31	13.733	19	20.467	21.933		18.7833	1.78671	7			2	31	0.133	0.6	1.533	2.6		1.2165	0.545305	7			2	8	0.4	0	0	0		0.1	0.1	7
		2	32	24.467	29.733	19.067	12.667		21.4835	3.65748	8			2	32	0.933	5.267	1.133	0.867		2.05	1.07382	8			2	9	0	0.8	0	0.4		0.3	0.191485	8
		2	33	27.467	17.6	27.133	25.733		24.4833	2.32495	9			2	33	1.133	0.867	1	1.6		1.15	0.159525	9			2	10	0	0	0.4	1.8		0.55	0.4272	9
		2	34	24.867	27.067	27.6	23.933		25.8667	0.874816	10			2	34	0.4	2.8	0.933	1.467		1.4	0.51499	10			2	11	0	0.4	0.6	0		0.25	0.15	10
		2	35	37.733	31.667	31.533	34		33.7332	1.44855	11			2	35	1	3.333	1.6	2.8		2.18325	0.535612	11			2	12	0.4	0.2	0.6	0.6		0.45	0.0957427	11
		2	36	42.333	33.133	37.667	29.2	LL	35.5832	2.838	12			2	36	1.467	2.267	2.267	1.2	LL	1.80025	0.274934	12			2	13	0.4	0	1	0.4	LL	0.45	0.206155	12
		2	37	29.533	36.133	31.733	26.333		30.933	2.05751	13			2	37	0.4	3.333	1.467	2.733		1.98325	0.655562	13			2	14	0.4	0.4	0.8	0		0.4	0.163299	13
		2	38	37.8	26	35.6	34.067		33.3668	2.5723	14			2	38	0.867	1.933	0.533	3.467		1.7	0.660325	14			2	15	0	0	0.6	0.4		0.25	0.15	14
		2	39	38.333	39.133	35.067	29.333		35.4665	2.2256	15			2	39	1.067	5.2	1.2	2.867		2.5835	0.963513	15			2	16	0	0.2	0.6	0		0.2	0.141421	15
		2	40	41.067	40.067	41.4	34		39.1335	1.73445	16			2	40	1	4.533	2.4	4.933		3.2165	0.924621	16			2	17	0.4	0	0.6	0.4		0.35	0.125831	16
		2	41	45.4	51.6	38.533	44.933		45.1165	2.66915	17			2	41	4.2	16.667	1.8	9		7.91675	3.27833	17			2	18	0.2	1.8	1.4	1.8		1.3	0.378594	17
		2	42	53.933	50.933	60	38.6		50.8665	4.50274	18			2	42	9.2	20	21.133	8.067		14.6	3.46025	18			2	19	6	2.4	0.4	1.2		2.5	1.23693	18
		2	43	28.467	36.867	60	59.333		46.1668	7.98162	19			2	43	3.4	11.333	18.933	21.6		13.8165	4.09708	19			2	20	14.2	1.8	2.2	0.4		4.65	3.20663	19
		2	44	60	51.8	60	21.2		48.25	9.22149	20			2	44	18.533	25.733	14.4	2.533		15.2998	4.85718	20			2	21	10.4	8.2	0.8	8		6.85	2.08866	20
		2	45	45.133	60	33.4	40.667		44.8	5.61392	21			2	45	10.333	35.333	3.8	9		14.6165	7.04783	21			2	22	0.8	12	1.4	4.4		4.65	2.57342	21
		2	46	32.733	48.533	40.667	13.4		33.8332	7.53609	22			2	46	6.733	18.4	7.4	0.867		8.35	3.65736	22			2	23	2.8	9.2	0	4		4	1.92527	22
		2	47	37.867	26.467	33.733	41.467		34.8835	3.21979	23			2	47	11.267	6.533	1.267	8.733		6.95	2.12693	23			2	24	0	2.4	2	2.4		1.7	0.574456	23
		3	48	15.533	30.6	31.733	32.4		27.5665	4.02833	0			3	48	1.067	3.467	1.733	10.133		4.1	2.07364	0			3	1	0	0	0.8	0		0.2	0.2	0
		3	49	59.933	52.467	41.4	26.533		45.0833	7.26127	1			3	49	19.133	19.533	10.067	7.4		14.0332	3.10894	1			3	2	8.4	10.8	2.8	28.8		12.7	5.62228	1
		3	50	24.667	7.267	60	27		29.7335	11.0074	2			3	50	2.533	0.533	19.267	6.133		7.1165	4.21261	2			3	3	7.4	0	0.6	1		2.25	1.72892	2
		3	51	29	20.8	30.533	23.333		25.9165	2.3035	3			3	51	8.733	5.467	6	6.267		6.61675	0.72475	3			3	4	3	4	1.6	17.6		6.55	3.71607	3
		3	52	33.667	60	22.267	60		43.9835	9.53543	4			3	52	6.533	27.533	1.667	20.933		14.1665	6.04812	4			3	5	1	19	1.2	12.4		8.4	4.42493	4
		3	53	41.067	7.733	15	27.2		22.75	7.30803	5			3	53	8.333	0.267	0.933	7.333		4.2165	2.10234	5			3	6	0	0	0.2	10.6		2.7	2.63376	5
		3	54	21.4	10.133	11.6	6.133		12.3165	3.24071	6			3	54	1.933	0.133	0.4	0.6		0.7665	0.400426	6			3	7	0	0	0	0.8		0.2	0.2	6
		3	55	6.733	12.533	12.733	40.667		18.1665	7.62811	7			3	55	0.467	1.067	0.6	10.867		3.25025	2.54217	7			3	8	0	0.2	1.4	0		0.4	0.33665	7
		3	56	21.8	7.2	20.733	12.8		15.6333	3.45426	8			3	56	1.2	0.667	0.333	0.4		0.65	0.197015	8			3	9	0	0	0	0		0	0	8
		3	57	28.8	59.6	10.267	34.067		33.1835	10.1776	9			3	57	4	17.333	0.333	4.4		6.5165	3.71982	9			3	10	0	4.4	0.8	4		2.3	1.11206	9
		3	58	19.933	4.2	22.6	13.8		15.1333	4.08354	10			3	58	1.4	0.067	1	0.867		0.8335	0.279477	10			3	11	0.2	0	0	0		0.05	0.05	10
		3	59	23.4	20	27.667	24.867		23.9835	1.59576	11			3	59	1.4	4.2	0.667	3.2		2.36675	0.810291	11			3	12	0	0.6	0	1.2		0.45	0.287228	11
		3	60	31.8	26.667	21.067	29.6		27.2835	2.32361	12			3	60	1.133	2.667	1.6	3.733		2.28325	0.580154	12			3	13	0.4	0.2	0.6	0.8		0.5	0.129099	12
		3	61	35.133	23.8	27.8	26.733		28.3665	2.4088	13			3	61	4.267	1.4	1.667	3.2		2.6335	0.673603	13			3	14	0.4	0	0	4.2		1.15	1.02103	13
		3	62	34.2	31.067	31.133	34.267		32.6668	0.904767	14			3	62	0.2	4.867	1.133	2.8		2.25	1.02475	14			3	15	0	0.2	0	0		0.05	0.05	14
		3	63	38.667	38.933	35.933	47.667		40.3	2.54753	15			3	63	1.733	5.733	1.4	4.867		3.43325	1.09428	15			3	16	0	1.6	0.4	0.4		0.6	0.34641	15
		3	64	49.6	51.467	59.2	47.733		52	2.51812	16			3	64	2.067	14.4	13.2	10.4		10.0168	2.77926	16			3	17	3.2	5.6	0.6	1.4		2.7	1.10905	16
		3	65	53.667	60	47.667	46.333		51.9168	3.13104	17			3	65	6.6	29.333	4.867	8.467		12.3167	5.71951	17			3	18	0.8	9.6	0.8	3.6		3.7	2.07445	17
		3	66	46.867	44.467	43.467	39.667		43.617	1.4975	18			3	66	5.267	15.467	8.8	5.533		8.76675	2.37346	18			3	19	3.8	7.6	0	2.4		3.45	1.59034	18
		3	67	57.667	60	60	30.733		52.1	7.14353	19			3	67	16.267	26.4	17.467	4.8		16.2335	4.431	19			3	20	10.8	15	0.4	12.2		9.6	3.18852	19
		3	68	24.333	44.8	41.267	43.867		38.5667	4.8031	20			3	68	2.667	18.867	7.133	10.533		9.8	3.42467	20			3	21	5.2	6.6	0.4	1.4		3.4	1.48549	20
		3	69	38.6	33.467	41.4	25.267		34.6835	3.54261	21			3	69	9.067	4.933	4.6	2.533		5.28325	1.3684	21			3	22	2.4	2.4	0	5.8		2.65	1.19269	21
		3	70	21.733	34.267	29.6	43		32.15	4.44616	22			3	70	0.933	11.2	2.067	9.667		5.96675	2.60809	22			3	23	0	6.2	1	0.8		2	1.41657	22
		3	71	40.267	32.133	53.867	27.2		38.3667	5.82684	23			3	71	5.4	NA	12.467	4.2		7.35567	2.23351	23			3	24	3	1	0	5.4		2.35	1.19269	23
		4	72	32.733	33.267	25.133	50.133		35.3165	5.27658	0			4	72	2.467	8.133	1.2	17.533		7.33325	3.719	0			4	1	0	4.8	3	2.6		2.6	0.989949	0
		4	73	20.733	39.533	27	10.4		24.4165	6.09107	1			4	73	0.933	11.933	1	0.933		3.69975	2.74446	1			4	2	0.6	10.2	0	0		2.7	2.504	1
		4	74	40.8	35.467	51.333	43.4		42.75	3.30322	2			4	74	5.6	6.333	13.667	11.267		9.21675	1.94519	2			4	3	9.4	2.4	3.2	7.6		5.65	1.69386	2
		4	75	29.267	29.333	47.6	33.933		35.0332	4.32894	3			4	75	3	8.2	7.067	6.867		6.2835	1.13316	3			4	4	5.8	4.8	1.6	4.2		4.1	0.896289	3
		4	76	18.133	12.267	14.8	7.2		13.1	2.30443	4			4	76	0.2	0.333	0.667	0.533		0.43325	0.1037	4			4	5	1.4	0	0	0		0.35	0.35	4
		4	77	45.333	38	15.533	42.733		35.3997	6.79396	5			4	77	6.667	6.533	0.467	9.533		5.8	1.90755	5			4	6	0.4	2.6	3.4	8		3.6	1.59792	5
		4	78	39.933	20.667	32.133	30.6		30.8332	3.95708	6			4	78	8.533	4.133	5.067	4.2		5.48325	1.03859	6			4	7	4.6	1.4	0	6.6		3.15	1.49972	6
		4	79	12.733	5.667	20.2	11.933		12.6332	2.97608	7			4	79	0.333	0	0	1.067		0.35	0.251558	7			4	8	0	0	0	0		0	0	7
		4	80	10.733	44	8.133	35.4		24.5665	8.92773	8			4	80	0.867	9.6	0.267	5.067		3.95025	2.16486	8			4	9	0	8	2	0		2.5	1.89297	8
		4	81	26.933	22.533	43.6	17.867		27.7333	5.60342	9			4	81	0.467	2.4	5.6	1.467		2.4835	1.11127	9			4	10	5	0.6	0	0		1.4	1.2083	9
		4	82	12.8	7.2	8.067	29.6		14.4168	5.20853	10			4	82	0	0.133	0.2	5.533		1.4665	1.35614	10			4	11	0	0	0.8	0		0.2	0.2	10
		4	83	38.867	18.4	14.133	13.667		21.2667	5.96262	11			4	83	5.133	0.6	0.533	1.133		1.84975	1.10262	11			4	12	0	0	0	5		1.25	1.25	11
		4	84	45.533	60	57	47.6	Recovery	52.5333	3.52426	12			4	84	10.4	26.867	17.6	16.133	Recovery	17.75	3.41296	12			4	13	42.8	54	43	31.8	Recovery	42.9	4.53174	12
		4	85	60	60	60	60		60	0	13			4	85	17.6	26.133	19.533	23.6		21.7165	1.93146	13			4	14	42	34.6	53.2	32.4		40.55	4.68997	13
		4	86	47.267	35.267	39.6	60		45.5335	5.42288	14			4	86	5.733	4.267	2.333	20		8.08325	4.0328	14			4	15	2.8	4	26	6.8		9.9	5.4317	14
		4	87	47.733	48.4	47.867	46.8		47.7	0.332788	15			4	87	7.8	12.4	6.533	12.8		9.88325	1.59179	15			4	16	7.6	16	15.2	17.6		14.1	2.22336	15
		4	88	60	56.667	58.2	54.2		57.2668	1.22835	16			4	88	19.933	21.667	17.867	14.267		18.4335	1.59124	16			4	17	23.4	28.4	26.6	27.4		26.45	1.08128	16
		4	89	31.2	26.867	34.867	39.6		33.1335	2.70537	17			4	89	2.267	3.067	3	8.133		4.11675	1.35095	17			4	18	4.2	4	10.2	1.6		5	1.83121	17
		4	90	44.067	45.867	40.2	44.467		43.6502	1.21309	18			4	90	8.2	13.267	4	8.8		8.56675	1.89597	18			4	19	5.6	17	14.6	15		13.05	2.53821	18
		4	91	44.667	57	43.8	23.867		42.3335	6.85391	19			4	91	8.867	18.4	9.067	3.067		9.85025	3.17137	19			4	20	11.2	21.6	5.8	14		13.15	3.29077	19
		4	92	28.8	25.533	43.467	31.133		32.2332	3.91672	20			4	92	1.733	1.8	7.733	3.467		3.68325	1.40823	20			4	21	11.8	5.2	3.4	4.4		6.2	1.90263	20
		4	93	23.067	47.867	33.267	21		31.3002	6.13872	21			4	93	2.333	14.467	3.8	2.533		5.78325	2.91275	21			4	22	6.8	20	3.4	3.2		8.35	3.9702	21
		4	94	33.733	44.467	36.267	49.6		41.0167	3.66503	22			4	94	3.533	10.533	2.533	15.533		8.033	3.06866	22			4	23	4.6	14.4	18	6.6		10.9	3.17333	22
		4	95	32.067	49.4	31.333	8		30.2	8.49632	23			4	95	1.6	15.4	2.2	0.6		4.95	3.49893	23			4	24	3.4	21	0	3.8		7.05	4.72749	23
		5	96	40.2	10.467	16.8	28.933		24.1	6.59366	0			5	96	3.467	0.533	0	5.067		2.26675	1.20506	0			5	1	0	0.2	1	2.4		0.9	0.544671	0
		5	97	17.533	5.467	19.6	9.2		12.95	3.35763	1			5	97	0.4	0.133	0.533	0.4		0.3665	0.0839092	1			5	2	0	0.2	0	0		0.05	0.05	1
		5	98	23.6	39.067	20.6	30.667		28.4835	4.11072	2			5	98	0.6	6.333	2.067	5.8		3.7	1.40295	2			5	3	0.4	1.2	0.8	0		0.6	0.258199	2
		5	99	46.8	12.467	25.2	21.333		26.45	7.28808	3			5	99	6.667	1.133	1.2	3.133		3.03325	1.29698	3			5	4	0	0	0	3.2		0.8	0.8	3
		5	100	17.8	17.733	23.867	8.6		17	3.14766	4			5	100	0.467	0.333	0.867	0.533		0.55	0.113562	4			5	5	0	0	0	0		0	0	4
		5	101	14	22.067	14.4	55.267		26.4335	9.78874	5			5	101	0.6	2.533	1	12.733		4.2165	2.86923	5			5	6	0.6	0	3.6	0		1.05	0.861684	5
		5	102	16.8	13.933	16.067	18.2		16.25	0.890083	6			5	102	0.467	2	0.667	1.133		1.06675	0.340936	6			5	7	0	0.4	0	0		0.1	0.1	6
		5	103	18.133	13.933	25.2	10		16.8165	3.25058	7			5	103	0.6	0.867	0.667	0.467		0.65025	0.08335	7			5	8	0	0	0	0		0	0	7
		5	104	16	15.467	15.467	14.333		15.3167	0.351158	8			5	104	0.4	0.467	0.4	0.733		0.5	0.0792559	8			5	9	0	0	0	0		0	0	8
		5	105	24.133	19.8	33.533	34.2		27.9165	3.54988	9			5	105	0.467	1.133	5.933	3.867		2.85	1.26379	9			5	10	3.4	0	0	0		0.85	0.85	9
		5	106	33.533	17.067	29.667	13.467		23.4335	4.83666	10			5	106	2.867	1.333	1.667	1.067		1.7335	0.397268	10			5	11	2.2	0	0	2.6		1.2	0.697615	10
		5	107	24.8	28.667	16.333	36.533		26.5832	4.19908	11			5	107	0.933	2.4	1.067	5		2.35	0.943353	11			5	12	0	0	0.8	0.6		0.35	0.206155	11
		5	108	46.4	51.333	54.667	60		53.1	2.85887	12			5	108	13.467	19.467	13.333	20.133		16.6	1.85272	12			5	13	29.2	30.8	29.2	37.6		31.7	2.0025	12
		5	109	59.733	39.2	43.333	60		50.5665	5.4355	13			5	109	12.2	10.133	6.067	23.667		13.0168	3.77171	13			5	14	13	8.6	27.4	23.8		18.2	4.42719	13
		5	110	55.333	58.2	57.6	59.2		57.5833	0.81946	14			5	110	7.333	14.8	11.667	14.667		12.1168	1.75096	14			5	15	17	23	18	20		19.5	1.32288	14
		5	111	50.933	20.6	57.4	60		47.2332	9.08006	15			5	111	4.067	1.4	18.4	18.933		10.7	4.63284	15			5	16	23.8	1.6	38.4	10.2		18.5	8.05502	15
		5	112	45.467	49.667	55.467	60		52.6502	3.19442	16			5	112	5.667	14.2	13.533	26.8		15.05	4.36966	16			5	17	19.6	16.8	44.2	16		24.15	6.72774	16
		5	113	60	58.667	60	33.2		52.9668	6.5964	17			5	113	10.2	21.333	20	6.4		14.4832	3.66332	17			5	18	30	24.4	8.2	23.6		21.55	4.67217	17
		5	114	47.333	33.6	46.6	53.533		45.2665	4.18819	18			5	114	9.267	5.333	6	12.4		8.25	1.6286	18			5	19	13.6	7	13.6	17.2		12.85	2.12662	18
		5	115	37.133	38.133	37.4	35.133		36.9498	0.641416	19			5	115	5.333	8.467	1.933	6.6		5.58325	1.37649	19			5	20	4.6	8	6	8.2		6.7	0.858293	19
		5	116	32.8	32.667	35.133	38.867		34.8667	1.44866	20			5	116	2.333	7	3.267	8.133		5.18325	1.40824	20			5	21	4.6	12.2	6.8	2.2		6.45	2.13444	20
		5	117	33.933	60	38.133	20.867		38.2332	8.13368	21			5	117	2.733	23.467	5.2	3.333		8.68325	4.95583	21			5	22	5.2	23.2	3.8	4.4		9.15	4.6921	21
		5	118	30.467	29.667	41.467	52.267		38.467	5.32979	22			5	118	2	5.8	7.467	15.467		7.6835	2.83548	22			5	23	9.4	4.4	22.8	6.8		10.85	4.11208	22
		5	119	30.733	51.467	45.4	9.267		34.2167	9.38644	23			5	119	3.133	17.8	7.133	0.4		7.1165	3.82009	23			5	24	6	13.8	0	8.4		7.05	2.86051	23
	Genotype	Day	Hours	Animal1	Animal2	Animal3	Animal4		MEAN	SEM	ZT		Genotype	Day	Hours	Animal 1	Animal 2	Animal 3	Animal 4		MEAN	SEM	ZT		Genotype	Day	Hours	Animal 1	Animal 2	Animal 3	Animal 4		MEAN	SEM	ZT
	WT	1	0	15.133	5.133	39.133	27.733		21.783	7.40422	0		WT	1	0	2.4	0.333	14.8	13.067		7.65	3.66933	0		WT	1	1	8	0	15.8	1.2		6.25	3.63811	0
		1	1	51.533	39.333	43.867	36.6		42.8332	3.26419	1			1	1	22.133	15	17.2	12.667		16.75	2.01892	1			1	2	7.4	49	16.4	41		28.45	9.86623	1
		1	2	12.8	53.2	15.4	8.933		22.5832	10.2917	2			1	2	1.067	22.4	1.2	1.133		6.45	5.31674	2			1	3	0	60.6	0	0		15.15	15.15	2
		1	3	17.667	5.533	51.733	30.2		26.2832	9.8651	3			1	3	1.2	0.267	12.733	8.933		5.78325	3.0229	3			1	4	9.6	0	12.8	0.4		5.7	3.24294	3
		1	4	40.067	31.333	19	19.4		27.45	5.08651	4			1	4	12.8	11.267	2.267	4.133		7.61675	2.59722	4			1	5	1.4	28.4	0.4	21.8		13	7.11758	4
		1	5	15.667	24.133	13.867	9.333		15.75	3.09577	5			1	5	1.533	5.067	3.333	0.667		2.65	0.978449	5			1	6	0	10	4.4	0.4		3.7	2.32307	5
		1	6	44.067	24.733	22.067	14.067		26.2335	6.36179	6			1	6	14.2	5.333	2.933	1.8		6.0665	2.80941	6			1	7	0.2	7.8	2	11.2		5.3	2.54886	6
		1	7	7.467	11.267	25.667	15.733		15.0335	3.9264	7			1	7	0.467	1.667	4.267	2.333		2.1835	0.794589	7			1	8	0.4	0.2	3.2	0		0.95	0.754431	7
		1	8	36.267	33.8	31.867	32.133		33.5168	1.01162	8			1	8	6.533	7.8	9.067	9.267		8.16675	0.634077	8			1	9	9	12.8	12.2	9		10.75	1.01776	8
		1	9	21	24.533	11.6	7.933		16.2665	3.89406	9			1	9	5.467	5.133	0.6	0.8		3	1.33028	9			1	10	0	5.2	0	3.8		2.25	1.3301	9
		1	10	22.8	7.4	21.467	44.2		23.9668	7.59085	10			1	10	1.733	0.8	1.667	9.533		3.43325	2.04433	10			1	11	6.4	0	0.6	0		1.75	1.55644	10
		1	11	30.933	46.533	36.8	33.267		36.8833	3.4352	11			1	11	3.8	15.333	6.333	8.667		8.53325	2.47486	11			1	12	6	35.4	5.2	0		11.65	8.02761	11
		1	12	46.467	49.067	50.6	50.333	Baseline	49.1167	0.944411	12			1	12	16.8	24.933	17.667	24.733	Baseline	21.0333	2.20129	12			1	13	35.4	77	35	30.4	Baseline	44.45	10.9091	12
		1	13	60	58.067	46.2	60		56.0667	3.32032	13			1	13	26.067	26.6	14.467	39.4		26.6335	5.09354	13			1	14	50.2	89	27.8	81.2		62.05	14.1613	13
		1	14	60	55	59.467	60		58.6167	1.21211	14			1	14	31.133	27.067	29.733	35.867		30.95	1.84321	14			1	15	47.8	110.4	55.8	121.8		83.95	18.7782	14
		1	15	60	60	60	60		60	0	15			1	15	23.733	32.067	32.8	38		31.65	2.95096	15			1	16	54.2	119	52.6	90.6		79.1	15.9335	15
		1	16	60	60	60	60		60	0	16			1	16	20.467	29.867	27.467	36.333		28.5335	3.27638	16			1	17	49.2	105.6	32	105.8		73.15	19.1179	16
		1	17	38	53.267	49.6	60		50.2167	4.60657	17			1	17	2.4	21.8	17.533	38.267		20	7.37546	17			1	18	56.2	56.2	23.6	2.8		34.7	13.1191	17
		1	18	60	37.067	35.4	18		37.6168	8.61705	18			1	18	7.667	16.467	11.933	3.867		9.9835	2.71744	18			1	19	5	48.6	12.8	113.8		45.05	24.8046	18
		1	19	35.467	34.067	53.933	52.6		44.0167	5.3549	19			1	19	1.2	10.667	20.133	20.133		13.0332	4.53172	19			1	20	24.6	14	21.6	9.6		17.45	3.43839	19
		1	20	40.333	23.8	20.267	30		28.6	4.39794	20			1	20	1.933	3.8	3.533	6.467		3.93325	0.939807	20			1	21	2	5	2.8	29		9.7	6.46452	20
		1	21	36.733	58.933	39.667	55.867		47.8	5.60985	21			1	21	2	23.133	10.6	25.267		15.25	5.47469	21			1	22	31	54	15.2	5.8		26.5	10.5383	21
		1	22	49.467	41.533	33.667	11.2		33.9667	8.24581	22			1	22	2.4	17.933	8.867	2		7.8	3.72622	22			1	23	0	31.2	13.2	22.8		16.8	6.69925	22
		1	23	45.333	17.4	33	58.133		38.4665	8.69674	23			1	23	2.333	4.4	8.733	28.933		11.0998	6.09213	23			1	24	35.8	12.4	6	48.2		25.6	9.8877	23
		2	24	60	60	30.6	23		43.4	9.70876	0			2	24	6.8	35.133	7.933	6.933		14.1997	6.98233	0			2	1	5.4	134.6	7.4	45.8		48.3	30.2313	0
		2	25	13.4	60	45.267	42.6		40.3167	9.75389	1			2	25	0.733	34.067	16.6	15.533		16.7332	6.81863	1			2	2	6.4	147.2	16.4	0		42.5	35.0628	1
		2	26	39.333	56.667	44.733	24.6		41.3332	6.65009	2			2	26	5.6	27.4	12.533	8.6		13.5333	4.83529	2			2	3	5.4	67	9.8	38		30.05	14.2776	2
		2	27	18.867	3.6	19.8	34.8		19.2668	6.37164	3			2	27	0.733	0.133	1.6	10		3.1165	2.31417	3			2	4	4.6	0	0.4	0		1.25	1.12064	3
		2	28	16.067	51	29.2	7.133		25.85	9.52968	4			2	28	0.2	18.867	8.467	0.8		7.0835	4.35536	4			2	5	0	20	9.4	0.4		7.45	4.71266	4
		2	29	34.533	8.2	26.533	9.267		19.6333	6.50505	5			2	29	3.133	1	4.733	1.133		2.49975	0.890022	5			2	6	0	0	2.2	3.8		1.5	0.925563	5
		2	30	12.133	31.733	22.533	36.667		25.7665	5.40638	6			2	30	0.267	7.933	2.2	9.2		4.9	2.16879	6			2	7	6.2	9.4	0.4	0		4	2.29056	6
		2	31	33.467	6.667	12.067	11.067		15.817	5.9991	7			2	31	2.533	0.667	1.267	1.6		1.51675	0.389887	7			2	8	0	0	0.8	10.2		2.75	2.49048	7
		2	32	24.867	24.2	36.333	6.933		23.0832	6.06091	8			2	32	2.6	5.067	7.933	0.533		4.03325	1.59642	8			2	9	0	4.6	4.8	4.2		3.4	1.14018	8
		2	33	24.733	29.2	21.733	45.933		30.3997	5.4002	9			2	33	1.067	6.933	1.533	10.733		5.0665	2.31075	9			2	10	7.8	13.2	0.6	0		5.4	3.14643	9
		2	34	32.133	20.333	31.4	22.2		26.5165	3.05861	10			2	34	2.6	7.4	4.8	4.733		4.88325	0.982207	10			2	11	2.6	12.8	2.8	8.8		6.75	2.47706	10
		2	35	27.4	48.4	34.2	31.4		35.35	4.56828	11			2	35	1.333	18.867	6.267	9.933		9.1	3.70181	11			2	12	12	48.8	6.8	0		16.9	10.9134	11
		2	36	43.067	38.467	36.467	47.8	LL	41.4502	2.52761	12			2	36	7.6	11.4	5.467	17.333	LL	10.45	2.60178	12			2	13	19.8	28	5.8	34	LL	21.9	6.10492	12
		2	37	31.6	31.6	32.467	37.733		33.35	1.47522	13			2	37	2.333	7.933	3.8	12.467		6.63325	2.27745	13			2	14	8.6	12.2	3	3.2		6.75	2.23215	13
		2	38	50.733	51.6	47.4	36.533		46.5665	3.46484	14			2	38	12.4	19.333	16.133	8.133		13.9997	2.41475	14			2	15	6.2	71.8	29.8	60		41.95	14.8394	14
		2	39	46.667	41.2	47.333	53.933		47.2832	2.6078	15			2	39	12.867	16.2	14.467	21.667		16.3002	1.91399	15			2	16	21.4	37.8	13.2	52.6		31.25	8.76332	15
		2	40	60	60	58.067	60		59.5168	0.48325	16			2	40	21.067	31.533	25.867	33.133		27.9	2.75992	16			2	17	47.2	119.8	53.8	88		77.2	16.7803	16
		2	41	60	55.667	55.4	60		57.7668	1.29052	17			2	41	28.667	27	22.467	36.6		28.6835	2.94605	17			2	18	57.2	93.6	41.2	96.4		72.1	13.6307	17
		2	42	60	33.667	52.533	60		51.55	6.21539	18			2	42	32.6	13.2	22.267	35.867		25.9835	5.15341	18			2	19	42	43.2	51	87		55.8	10.5896	18
		2	43	58.067	60	60	36		53.5168	5.85667	19			2	43	22.867	29.067	27.867	18.533		24.5835	2.42278	19			2	20	24.4	83.6	50.4	38.4		49.2	12.6375	19
		2	44	18	53.4	23.6	31.933		31.7332	7.76874	20			2	44	1.467	24.4	3.467	10.467		9.95025	5.18861	20			2	21	10.4	71.8	0.8	0.4		20.85	17.1399	20
		2	45	53.067	13.267	35.6	43.667		36.4002	8.49693	21			2	45	25.533	2.6	8.4	18.6		13.7833	5.12593	21			2	22	27.4	1.6	17.8	64.2		27.75	13.2651	21
		2	46	29.733	56.067	32.267	31		37.2668	6.28806	22			2	46	3.133	23	6.267	8.667		10.2668	4.39302	22			2	23	7.6	61.4	4.4	1.2		18.65	14.3098	22
		2	47	54.4	8.133	23.067	13.933		24.8832	10.3078	23			2	47	24.667	1.267	6.4	4.467		9.20025	5.26309	23			2	24	3.6	0	6.2	50.6		15.1	11.9014	23
		3	48	17	58	51.667	55.267		45.4835	9.58265	0			3	48	1.2	24.933	18.6	23.867		17.15	5.49392	0			3	1	22.8	77.2	17.4	0		29.35	16.6752	0
		3	49	34.333	59.2	32.533	24.867		37.7332	7.44405	1			3	49	13.733	29.667	11.267	11.667		16.5835	4.39451	1			3	2	18.4	86.4	20.8	54.6		45.05	16.071	1
		3	50	60	60	55.733	60		58.9333	1.06675	2			3	50	30.267	36.133	19.333	43.267		32.25	5.05992	2			3	3	89.8	135.2	46.4	152		105.85	23.7752	2
		3	51	60	60	41.4	49.6		52.75	4.50805	3			3	51	33.333	32.667	12.467	19.4		24.4667	5.12771	3			3	4	20	103.2	20	103.2		61.6	24.0178	3
		3	52	30.133	33.4	38.933	14.333		29.1998	5.27786	4			3	52	4	12.067	11.667	4.667		8.10025	2.18052	4			3	5	3.4	19	16.6	4		10.75	4.10152	4
		3	53	13.733	32.8	22.8	17.8		21.7832	4.11375	5			3	53	1.467	13.267	3.8	3.133		5.41675	2.66234	5			3	6	0.6	19.8	5.6	0		6.5	4.6076	5
		3	54	36.267	5.8	45.4	47.667		33.7835	9.64771	6			3	54	5.933	0.467	14.533	19		9.98325	4.17298	6			3	7	15	0	20.2	8.2		10.85	4.37217	6
		3	55	21.067	16.733	12.733	6.867		14.35	3.01948	7			3	55	2.667	2.733	0.6	0.8		1.7	0.578949	7			3	8	0	0.6	0	0.2		0.2	0.141421	7
		3	56	11.933	42	19.667	16.733		22.5832	6.66563	8			3	56	0.933	16.867	2.267	3.2		5.81675	3.71267	8			3	9	0	37	1.2	0		9.55	9.15437	8
		3	57	25.4	18.067	18.2	29.067		22.6835	2.73164	9			3	57	1.4	3.867	2.467	7.4		3.7835	1.30704	9			3	10	7.4	0.2	1.2	0.6		2.35	1.69583	9
		3	58	19.067	6.6	40.333	6.333		18.0832	7.98933	10			3	58	2.2	0.933	6.733	0.2		2.5165	1.46494	10			3	11	0	0	5	0		1.25	1.25	10
		3	59	51.667	42.067	10.867	41.467		36.517	8.86355	11			3	59	15.6	16.667	0.4	10.267		10.7335	3.71807	11			3	12	4.8	48.4	0	35.8		22.25	11.7863	11
		3	60	19.8	34.733	43.267	38.8		34.15	5.09088	12			3	60	1.267	11.267	12.333	9.6		8.61675	2.51363	12			3	13	4.4	20.8	16.4	0.4		10.5	4.83149	12
		3	61	23.067	36.333	20	19.8		24.8	3.91635	13			3	61	2.267	11.533	1.8	4.933		5.13325	2.24208	13			3	14	6.6	33.4	0.4	2.4		10.7	7.67615	13
		3	62	32.333	35.4	43.267	51.733		40.6833	4.34369	14			3	62	3.733	8.2	9.733	23.4		11.2665	4.23999	14			3	15	29.6	14.8	15.2	0.8		15.1	5.87963	14
		3	63	41.4	35.667	42.267	24.133		35.8668	4.17633	15			3	63	8.067	7.333	11.267	4.8		7.86675	1.33203	15			3	16	1.8	7.8	17.4	13.2		10.05	3.37972	15
		3	64	60	47.133	60	53.333		55.1165	3.0905	16			3	64	25.6	17.333	26.133	27.4		24.1165	2.29246	16			3	17	39.2	47.8	62.4	82.4		57.95	9.45247	16
		3	65	60	60	60	60		60	0	17			3	65	30.467	29.933	24.8	31		29.05	1.43331	17			3	18	51.6	114	82.2	84.8		83.15	12.75	17
		3	66	60	60	60	60		60	0	18			3	66	30.8	31.067	28.667	33.133		30.9168	0.913297	18			3	19	46.6	101.2	60.2	70.8		69.7	11.6093	18
		3	67	43.8	28	43.133	29.2		36.0332	4.30073	19			3	67	14.533	6.933	16.133	6.867		11.1165	2.45624	19			3	20	3.4	6.4	21.6	10.8		10.55	3.98445	19
		3	68	54.133	57.533	31.6	49.2		48.1165	5.76511	20			3	68	20.467	18.4	6.533	21.2		16.65	3.42403	20			3	21	22.6	45	11.2	27		26.45	7.02252	20
		3	69	18.067	32.733	40.6	28.267		29.9168	4.70108	21			3	69	1.867	11.867	11.133	7.933		8.2	2.2772	21			3	22	7	39.2	17	0.4		15.9	8.48312	21
		3	70	43.933	23.067	43.133	17.133		31.8165	6.87406	22			3	70	17.6	8.2	14.4	4		11.05	3.05437	22			3	23	3.4	22.2	26	42.6		23.55	8.04544	22
		3	71	21.533	37	26.4	51		33.9832	6.52677	23			3	71	0.933	11.267	3.667	17.333		8.3	3.72084	23			3	24	9.4	38.2	3.4	0		12.75	8.70302	23
		4	72	42.333	36.733	43.133	15.533		34.433	6.45884	0			4	72	13.733	12.6	11	2.933		10.0665	2.44302	0			4	1	0.2	24.8	17	35.4		19.35	7.41367	0
		4	73	47.533	29.667	32.467	43.467		38.2835	4.28658	1			4	73	14.467	9.867	8.067	13.267		11.417	1.48183	1			4	2	13	25.4	22	26.8		21.8	3.10161	1
		4	74	25.867	51.333	43.8	14.867		33.9667	8.31006	2			4	74	3.2	14.333	10.933	2.533		7.74975	2.9067	2			4	3	0.4	23	10	0.6		8.5	5.32698	2
		4	75	51.733	26.467	10.867	50.133		34.8	9.84909	3			4	75	17.467	6.733	0.2	18.533		10.7332	4.40767	3			4	4	17.4	17.6	0	28		15.75	5.80424	3
		4	76	21.267	19.933	50.933	17.133		27.3165	7.91915	4			4	76	2.4	6	17.6	2.267		7.06675	3.61598	4			4	5	0	4.4	30.4	0		8.7	7.3073	4
		4	77	13.533	33.4	34.4	36.867		29.55	5.38847	5			4	77	1.533	10.333	7.467	14.533		8.4665	2.72884	5			4	6	16.4	32.8	12	0		15.3	6.78503	5
		4	78	43.2	60	37.2	36.333		44.1833	5.48884	6			4	78	18.6	29.4	9.067	14.4		17.8667	4.31091	6			4	7	11.4	91.6	11.8	34.4		37.3	18.8811	6
		4	79	33.533	28.4	17.6	17.867		24.35	3.9615	7			4	79	4.267	5.067	0.8	3.2		3.3335	0.927042	7			4	8	1.2	3.4	0	1.8		1.6	0.707107	7
		4	80	28.133	12.733	26.067	9.733		19.1665	4.64037	8			4	80	5.533	1.8	3.4	0.8		2.88325	1.03286	8			4	9	0	0.4	3.8	4.4		2.15	1.13541	8
		4	81	8.8	60	23.667	44.133		34.15	11.2561	9			4	81	0.533	23.733	2.867	11.467		9.65	5.25009	9			4	10	7	82	1.8	0		22.7	19.8223	9
		4	82	21.733	9.4	47.867	21.4		25.1	8.11302	10			4	82	0.467	1.2	19.867	2		5.8835	4.67167	10			4	11	0	0	30.4	0.8		7.8	7.53569	10
		4	83	34	30.467	36.067	53.667		38.5502	5.16984	11			4	83	4	5.6	8.2	22.867		10.1668	4.32096	11			4	12	22.4	10	9.2	3.6		11.3	3.96443	11
		4	84	56.333	24.2	18.133	13.4	Recovery	28.0165	9.69414	12			4	84	26.2	5.467	2.467	2	Recovery	9.0335	5.77349	12			4	13	0.6	12	4	75.4	Recovery	23	17.6293	12
		4	85	45	60	54.933	60		54.9832	3.53557	13			4	85	11.4	28.333	22	30.933		23.1665	4.34763	13			4	14	54.8	94.4	55.6	25.6		57.6	14.1129	13
		4	86	27.133	40.4	60	60		46.8833	8.04261	14			4	86	2.133	14.133	30.2	39.6		21.5165	8.32993	14			4	15	66.4	34.6	72.4	1.4		43.7	16.3582	14
		4	87	60	48.467	56.2	60		56.1668	2.71838	15			4	87	32.933	17.4	20.667	38.533		27.3833	4.99908	15			4	16	60.8	37.6	31.4	101		57.7	15.7591	15
		4	88	51.133	49.067	41.6	60		50.45	3.78488	16			4	88	14.6	16.8	10.933	39.667		20.5	6.50257	16			4	17	65	54.4	14.4	38.6		43.1	10.9971	16
		4	89	60	33.4	43.867	60		49.3167	6.52755	17			4	89	29.267	6.8	14.733	31.267		20.5167	5.8718	17			4	18	45.2	10.4	29	108.8		48.35	21.3673	17
		4	90	60	58.2	50.533	39.8		52.1333	4.59493	18			4	90	22.4	21.467	19.667	13.2		19.1835	2.07357	18			4	19	15	47	19.6	88.8		42.6	16.9425	18
		4	91	33.8	33.333	23.933	32.133		30.7998	2.31568	19			4	91	5.867	9.667	2.067	12.333		7.4835	2.24048	19			4	20	23	22.8	0.6	17.4		15.95	5.27849	19
		4	92	60	33.667	47	30.333		42.75	6.78422	20			4	92	27.133	8.267	10.4	8.2		13.5	4.57295	20			4	21	7.4	15.4	22.4	75.8		30.25	15.4894	20
		4	93	35.533	30.067	24.8	43.267		33.4168	3.94731	21			4	93	10.133	9.667	3.933	16.533		10.0665	2.57552	21			4	22	20.2	22.2	4.6	38.4		21.35	6.91201	21
		4	94	24.267	8.2	34.667	28.933		24.0168	5.68499	22			4	94	4.533	0.933	11.533	9.267		6.5665	2.3775	22			4	23	7.2	0.2	20.4	4.2		8	4.37493	22
		4	95	31.8	60	29.667	29.2		37.6668	7.46589	23			4	95	8.4	23.133	5.6	8.067		11.3	3.99345	23			4	24	7.4	56.8	5.4	15.2		21.2	12.0535	23
		5	96	29.8	48.267	40.8	36.2		38.7668	3.8878	0			5	96	12.333	19.867	13	12.467		14.4168	1.82245	0			5	1	7	48	20.8	13.6		22.35	9.00236	0
		5	97	31.467	18.267	12.467	5.6		16.9502	5.48785	1			5	97	9.333	3.733	0.933	0.133		3.533	2.08167	1			5	2	0	3.6	0	16.4		5	3.89358	1
		5	98	38.533	60	51.467	53.467		50.8667	4.49684	2			5	98	12.733	24.267	19.2	22.867		19.7668	2.57647	2			5	3	23.6	67.6	37	14.4		35.65	11.6168	2
		5	99	24.133	15.133	27	19.467		21.4332	2.61146	3			5	99	1.4	3.6	0.733	2.867		2.15	0.657456	3			5	4	1	1.6	0	1		0.9	0.331662	3
		5	100	22.8	39.533	25.2	8.4		23.9833	6.37386	4			5	100	3.733	10	6.267	1.133		5.28325	1.88952	4			5	5	0	12.6	8.2	5.8		6.65	2.62599	4
		5	101	39	7.933	30.467	36.8		28.55	7.10634	5			5	101	13.6	0.667	8.333	8.8		7.85	2.67385	5			5	6	7.2	0	15	28.6		12.7	6.12127	5
		5	102	10.733	57.067	30.267	27.6		31.4168	9.58142	6			5	102	1	16.667	4.267	9.667		7.90025	3.42529	6			5	7	9.4	27.4	2.4	0.2		9.85	6.17002	6
		5	103	51.133	8.933	38.667	7.2		26.4833	10.9389	7			5	103	13.6	1.6	6	0.533		5.43325	2.96821	7			5	8	0	0	7.8	15.6		5.85	3.73397	7
		5	104	13.533	30.133	24.8	31.333		24.9497	4.06178	8			5	104	1	5.133	3.533	5.133		3.69975	0.975742	8			5	9	3.2	5	4	0		3.05	1.08128	8
		5	105	11.6	8	20.6	8.4		12.15	2.92959	9			5	105	0.533	0.533	1.267	0.6		0.73325	0.178616	9			5	10	0	0	0.4	0.8		0.3	0.191485	9
		5	106	50.6	42.467	51.133	59.333		50.8833	3.44449	10			5	106	13.6	11.467	15.933	17.8		14.7	1.37818	10			5	11	8.6	37	35.4	18.8		24.95	6.82856	10
		5	107	15.867	33.933	23.133	15.133		22.0165	4.36318	11			5	107	0.667	10.667	4.333	1.6		4.31675	2.25513	11			5	12	0	20.4	5.6	0.2		6.55	4.7954	11
		5	108	39.067	46.667	50.533	50.467		46.6835	2.69482	12			5	108	8.067	19.467	14.667	27.067		17.317	4.00281	12			5	13	36	64	32.8	10.6		35.85	10.9518	12
		5	109	34	60	59.4	60		53.35	6.45155	13			5	109	6.2	25.867	23.6	36.133		22.95	6.21346	13			5	14	62.4	76.6	41.4	12.4		48.2	13.9525	13
		5	110	50.733	45.4	31.333	60		46.8665	5.99221	14			5	110	19.667	15.467	2.267	36.333		18.4335	7.02418	14			5	15	58.2	40.2	2.2	56.2		39.2	12.9743	14
		5	111	33.533	50.333	45.4	60		47.3165	5.50476	15			5	111	5.067	21.4	16.867	35.467		19.7003	6.28251	15			5	16	52.2	65.2	38.6	18.6		43.65	9.96038	15
		5	112	60	60	60	60		60	0	16			5	112	36.667	27.067	29.267	30.733		30.9335	2.05427	16			5	17	33.4	92	82.4	145		88.2	22.8717	16
		5	113	60	51.067	60	60		57.7668	2.23325	17			5	113	34.867	18.267	27.8	32.867		28.4502	3.70589	17			5	18	35.6	43.4	89	142		77.5	24.5135	17
		5	114	60	57.667	59.867	28		51.3835	7.81283	18			5	114	30.733	24.4	25.133	6.4		21.6665	5.2817	18			5	19	3.6	37.8	48.2	120.8		52.6	24.6486	18
		5	115	60	40.733	30.267	31.8		40.7	6.83465	19			5	115	26.2	12.333	8.333	8.733		13.8998	4.19757	19			5	20	5.4	30	7.8	75.6		29.7	16.2711	19
		5	116	27.467	19.067	45.933	29.2		30.4168	5.62548	20			5	116	4.933	2.867	14.8	8.133		7.68325	2.60785	20			5	21	7.2	0.4	25.8	7.8		10.3	5.43231	20
		5	117	49.867	38.133	17.867	55.467		40.3335	8.31413	21			5	117	23.667	9	3.067	21.333		14.2668	4.9284	21			5	22	21.8	17.4	2.8	79.8		30.45	16.9437	21
		5	118	30.733	59.533	48.867	11		37.5333	10.6564	22			5	118	5.133	29.733	13.133	0.467		12.1165	6.42816	22			5	23	0	74.2	26.4	3		25.9	17.1473	22
		5	119	14.667	19.8	9.867	29.467		18.4503	4.19499	23			5	119	1.533	4.2	0.467	8.333		3.63325	1.75226	23			5	24	9.8	2.4	0	1.8		3.5	2.16102	23

## Sheet: Fig4B
Mean time-spent-awake, TDW, and activity over 48h LL as % of the levels reached in the preceding 24h under LD12:12
	WAKEFULNESS [% of the 24h mean LD12:12]
	HET	Animal 1	Animal 2	Animal 3	Animal 4	MEAN	SEM		WT	Animal 1	Animal 2	Animal 3	Animal 4	MEAN	SEM
	MEAN LL	96.0716	95.2271	94.1547	89.1048	93.6396	1.56164		MEAN LL	105.498	103.451	102.725	94.2284	101.475	2.48599
						% change	-6.36043							% change	1.47548
	TDW [% of the 24h mean LD12:12]
	HET	Animal 1	Animal 2	Animal 3	Animal 4	MEAN	SEM		WT	Animal 1	Animal 2	Animal 3	Animal 4	MEAN	SEM
	MEAN LL	57.0863	75.3544	74.1791	58.4516	66.2678	4.92059		MEAN LL	99.2568	112.122	88.7202	95.607	98.9265	4.91102
						% change	-33.7322							% change	-1.07348
	ACTIVITY [% of the 24h mean LD12:12]
	HET	Animal 1	Animal 2	Animal 3	Animal 4	MEAN	SEM		WT	Animal 1	Animal 2	Animal 3	Animal 4	MEAN	SEM
	MEAN LL	23.1084	28.7358	6.97263	36.5657	23.8456	6.26468		MEAN LL	97.6668	132.836	101.166	80.0562	102.931	10.9863
						% change	-76.1544							% change	2.93129
