# Supplementary material for: Rai1 frees mice from the repression of active wake behaviors by light
Source: eLife. 2017 May 26;6:e23292. doi: 10.7554/eLife.23292 (PMC5464769; doi:10.7554/eLife.23292)
Supplement: Figure 5—source data 1. — For both panels individual data are provided as well. DOI: http://dx.doi.org/10.7554/eLife.23292.012 [file elife-23292-fig5-data1.xlsx]

## Sheet: Fig5A
Hourly time course of time-spent-awake [min/h], TDW [min/h], and locomotor activity [movements/h] during LD12:12 (baseline 24h) and LD1:1 (48h)												Light	Dark
	WAKEFULNESS [min/h]												TDW [min/h]											ACTIVITY [movements/h]
	Genotype	Day	Hours	Animal 1	Animal 2	Animal 3	Animal 4		MEAN	SEM			Genotype	Day	Hours	Animal 1	Animal 2	Animal 3	Animal 4		MEAN	SEM		Genotype	Day	Hours	Animal 1	Animal 2	Animal 3	Animal 4		MEAN	SEM
	Het	1	0	59.333	42.733	57.133	60	baseline	54.7998	4.06861			Het	1	0	17.733	13.933	18.467	23.6	baseline	18.4333	1.98828		Het	1	0	21.4	17.2	35.2	37.6	baseline	27.85	5.03413
		1	1	31.8	60	41.733	56.133		47.4165	6.52239				1	1	8.8	34.533	11.133	21.4		18.9665	5.86628			1	1	19.2	47	35	14.4		28.9	7.46749
		1	2	28.333	48	36.933	29.333		35.6497	4.5425				1	2	4.333	20.667	5.467	4.333		8.7	3.99794			1	2	10.8	16.2	5.2	6.6		9.7	2.47184
		1	3	45.867	31.067	46.867	50.667		43.617	4.3092				1	3	11.8	4.533	12.067	9.2		9.4	1.74644			1	3	18.6	7	15.4	32.4		18.35	5.28354
		1	4	21	30.133	38.4	56.733		36.5665	7.60348				1	4	4.267	5.933	3.6	18.4		8.05	3.4847			1	4	6.2	6.6	21	6		9.95	3.68544
		1	5	20.267	41.467	35.533	42.933		35.05	5.18081				1	5	2.667	14.133	3.067	4.533		6.1	2.70754			1	5	11.4	23.8	8.4	4.2		11.95	4.21693
		1	6	44.667	60	57.4	60		55.5168	3.66814				1	6	8.8	29.067	18.533	25.533		20.4833	4.46731			1	6	36.2	28.8	44.2	18.8		32	5.40802
		1	7	60	40.667	42.267	54.733		49.4168	4.72533				1	7	28.733	16.2	0.333	24		17.3165	6.22288			1	7	9.2	23.2	25.2	50		26.9	8.48273
		1	8	34.4	10.467	17.2	8.533		17.65	5.88416				1	8	9.467	2.2	0.333	1.4		3.35	2.07455			1	8	0	0.2	0	4.8		1.25	1.18427
		1	9	19.467	17.467	30.8	13.867		20.4002	3.65505				1	9	3.467	1.533	0.8	1.8		1.9	0.563485			1	9	0.4	1	0	1.8		0.8	0.391578
		1	10	30.933	6.533	20.2	13.533		17.7997	5.19124				1	10	7.2	0.133	0.667	0.6		2.15	1.68752			1	10	0	0	0	4.4		1.1	1.1
		1	11	23.667	26.6	17.6	8.333		19.05	4.03398				1	11	1.667	4.067	0.6	0.533		1.71675	0.825356			1	11	0	0.4	0	0		0.1	0.1
		1	12	18.333	9.533	11.4	37.467		19.1833	6.38178				1	12	1.8	1	0.267	7.2		2.56675	1.57582			1	12	0	0	0.6	0.6		0.3	0.173205
		1	13	14.867	18.333	14.2	10.267		14.4168	1.65346				1	13	1.6	1.533	0.933	0.6		1.1665	0.241124			1	13	0	0.4	0	0		0.1	0.1
		1	14	18.533	18.133	23.333	23.733		20.933	1.50555				1	14	2.533	0.467	0.333	3.533		1.7165	0.787489			1	14	0	0	0	0		0	0
		1	15	11.133	10	27.2	18.733		16.7665	3.9817				1	15	0.133	0.467	1.2	1.933		0.93325	0.400879			1	15	0.6	0.2	0	0		0.2	0.141421
		1	16	20.267	36.533	33.533	16		26.5832	4.9933				1	16	2.867	10.067	1.267	0.933		3.7835	2.1366			1	16	1.8	0.8	0	0		0.65	0.4272
		1	17	21.667	31	20.467	22.6		23.9335	2.39561				1	17	1.333	10.267	0.333	1.867		3.45	2.29446			1	17	0	0.4	0.4	0		0.2	0.11547
		1	18	37.067	26.133	22.8	38.467		31.1167	3.90979				1	18	2.933	1.8	0.067	8.067		3.21675	1.72079			1	18	0	0	0.4	0.4		0.2	0.11547
		1	19	36.067	30.067	34.733	30.8		32.9168	1.46699				1	19	2.933	1.733	0.8	4.2		2.4165	0.737557			1	19	2	0.6	0.8	0.4		0.95	0.359398
		1	20	57.467	60	60	60		59.3667	0.63325				1	20	24.933	39.8	1	29.333		23.7665	8.20433			1	20	50.6	81	56.2	71.6		64.85	6.97776
		1	21	60	49.6	41.133	59.8		52.6333	4.53769				1	21	21.467	17.4	1.4	16.333		14.15	4.39155			1	21	10.2	21.2	25.4	53.8		27.65	9.28704
		1	22	41.667	42.467	48.667	52.533		46.3335	2.59173				1	22	11.933	14.867	7.267	15.133		12.3	1.82759			1	22	19.2	26.2	23	20.2		22.15	1.57136
		1	23	60	58	51.933	56.2		56.5332	1.7186				1	23	22.667	25.2	4.133	17.4		17.35	4.69561			1	23	22	26.2	18	30.2		24.1	2.63376
		2	24	22.533	28.067	22.133	28.933	LD1:1	25.4165	1.79088				2	24	5	5.733	0.133	3.467	LD1:1	3.58325	1.24319			2	24	2.2	2	2.2	6.2	LD1:1	3.15	1.01776
		2	25	58.867	59.6	59.467	60		59.4835	0.234643				2	25	20.667	27.067	0.6	26.867		18.8003	6.24597			2	25	46.8	40.8	48.6	50		46.55	2.02546
		2	26	28.667	31.467	36.6	26.267		30.7503	2.2206				2	26	2.867	4.6	0.667	7.267		3.85025	1.39452			2	26	1.2	2.2	0.4	2.2		1.5	0.43589
		2	27	58	59.8	60	53.267		57.7668	1.56588				2	27	22.4	29	0.133	18.467		17.5	6.18336			2	27	39	35	30.8	44.4		37.3	2.89885
		2	28	26.067	28.8	26.467	28.133		27.3667	0.654487				2	28	2.6	5.067	0.2	5.867		3.4335	1.28259			2	28	1.2	1.6	0.4	0.6		0.95	0.275379
		2	29	30.6	59.8	57.4	57.4		51.3	6.92315				2	29	5.333	33.4	6	22.333		16.7665	6.79646			2	29	26.6	46	35.6	6.4		28.65	8.40927
		2	30	23.4	20.867	19.467	20.8		21.1335	0.821406				2	30	1.533	3	0.6	1.933		1.7665	0.497032			2	30	0	1.4	0.4	0		0.45	0.330404
		2	31	56.933	60	42.867	59.333		54.7832	4.0263				2	31	21.8	37.133	10.067	26.133		23.7832	5.59617			2	31	22.6	51	26.8	27.4		31.95	6.43914
		2	32	17.533	17.6	21.933	15.933		18.2497	1.28678				2	32	1.4	2.6	0.4	1.333		1.43325	0.450931			2	32	0.8	0.8	0	0		0.4	0.23094
		2	33	42.4	47	51.2	49.2		47.45	1.88922				2	33	14.933	22.067	10.8	19.8		16.9	2.51971			2	33	23.2	23.6	21.6	12.2		20.15	2.68499
		2	34	25.533	14.533	5.8	17.733		15.8998	4.08282				2	34	2.533	1.4	0.067	1.333		1.33325	0.503922			2	34	0	0.8	0	0.6		0.35	0.206155
		2	35	16.667	36.067	36.733	24.267		28.4335	4.85594				2	35	2	11.667	6.333	4.067		6.01675	2.08089			2	35	14.2	11.8	4	1.4		7.85	3.05982
		2	36	21.667	11.267	11.333	41.267		21.3835	7.06393				2	36	1.2	1.067	0.4	10.933		3.4	2.51709			2	36	0	0	2.4	0		0.6	0.6
		2	37	38	49.933	35.133	34.6		39.4165	3.58411				2	37	11.467	24.333	9.6	12.4		14.45	3.34536			2	37	15.4	25.4	16.2	12.4		17.35	2.8052
		2	38	19.533	25.133	20.133	15.2		19.9997	2.03354				2	38	1.333	3	2.667	0.933		1.98325	0.502257			2	38	1	0	0	0		0.25	0.25
		2	39	20.467	13.2	20.933	41.067		23.9168	5.98459				2	39	1.4	1.533	1.133	9.467		3.38325	2.02962			2	39	1.2	1	8	0.4		2.65	1.79141
		2	40	33.067	11.6	15.533	6.667		16.7168	5.74391				2	40	4	0.533	0.4	0.733		1.4165	0.863881			2	40	0.2	0	0	0.6		0.2	0.141421
		2	41	28.8	51.467	30.067	46.2		39.1335	5.70842				2	41	5.467	17.533	5.133	13.533		10.4165	3.06554			2	41	8.8	20.6	10.8	7.6		11.95	2.9579
		2	42	28.267	18.067	20.2	11.6		19.5335	3.43765				2	42	2	3.267	1.133	0.667		1.76675	0.571274			2	42	0	0.8	0.4	2.2		0.85	0.478714
		2	43	57.267	49.2	32.733	55.4		48.65	5.57874				2	43	13.533	9.467	2.733	15.6		10.3332	2.83565			2	43	4.4	11.6	18.4	26.8		15.3	4.78156
		2	44	22.867	19.867	27.267	16.667		21.667	2.25536				2	44	3.133	2.2	1	1.2		1.88325	0.492372			2	44	0.8	0	0	2.2		0.75	0.518813
		2	45	40.267	53.333	51.133	52.733		49.3665	3.06849				2	45	5.267	20.133	12.4	17.6		13.85	3.28264			2	45	13.8	29.8	25.4	11.4		20.1	4.44934
		2	46	28.533	27.4	25.533	21.867		25.8333	1.45958				2	46	1	2	0.4	1.8		1.3	0.369685			2	46	0	0.4	0.2	0.6		0.3	0.129099
		2	47	55.2	59.067	58.2	58.133		57.65	0.843908				2	47	11.467	32.333	14.8	18.067		19.1668	4.59088			2	47	13.8	34.4	27.4	24.2		24.95	4.28359
		3	48	33.533	32.6	31.533	30.333		31.9998	0.68963				3	48	2.4	3.667	3.933	2.533		3.13325	0.389706			3	48	1.2	0.6	1.2	1.8		1.2	0.244949
		3	49	60	59.467	59.133	60		59.65	0.213264				3	49	25.467	34.133	19.533	23.8		25.7333	3.06604			3	49	28	48.2	47.2	59.2		45.65	6.48093
		3	50	43.933	40.067	39.067	33.8		39.2168	2.08825				3	50	8.867	12.067	1.533	3.8		6.56675	2.38986			3	50	1.6	1.6	0.4	5		2.15	0.991211
		3	51	44	58.6	50.533	59.467		53.15	3.65352				3	51	11.267	30.8	15.533	24		20.4	4.361			3	51	21.6	27.4	40	28		29.25	3.86297
		3	52	26.133	27.267	30.667	15.4		24.8668	3.29933				3	52	1.4	3.133	1.933	1.733		2.04975	0.377444			3	52	2.4	1.6	0	0.8		1.2	0.516398
		3	53	40	60	58.4	43.533		50.4832	5.09451				3	53	4	33.2	16.667	12.533		16.6	6.12961			3	53	42.2	26.2	16.2	16		25.15	6.16191
		3	54	25.667	22.133	24.067	25.667		24.3835	0.839626				3	54	0.333	2.933	1.067	3.867		2.05	0.81627			3	54	0.4	0.4	0.2	0		0.25	0.0957427
		3	55	60	58.733	41.067	47.533		51.8333	4.55253				3	55	17.6	29.933	6.667	14.533		17.1833	4.83344			3	55	10.4	31.2	17.6	32.2		22.85	5.32064
		3	56	27.2	26.133	18	10.8		20.5332	3.8401				3	56	2.333	2.067	1.133	1		1.63325	0.332797			3	56	1	0.4	0.2	0		0.4	0.216025
		3	57	44.333	48.533	32.867	48.867		43.65	3.73943				3	57	10.8	21.267	5.333	14.8		13.05	3.35654			3	57	12.6	21.6	15.6	23.6		18.35	2.56174
		3	58	12.8	11.467	20.933	10		13.8	2.44545				3	58	1	0.4	0.8	0.4		0.65	0.15			3	58	0.6	0	0	0.6		0.3	0.173205
		3	59	43.467	22.533	42.867	57.933		41.7	7.27649				3	59	9.067	2.4	6.467	22.2		10.0335	4.28124			3	59	14.8	1.6	29.6	14.6		15.15	5.72152
		3	60	13.467	9.067	19.267	13.2		13.7503	2.09663				3	60	0.267	0.2	1.333	0.4		0.55	0.264288			3	60	0	0	0	0		0	0
		3	61	14.4	46.733	12.067	38.933		28.0332	8.70475				3	61	0.333	13	0.8	8.067		5.55	3.04983			3	61	0.8	23	8	0		7.95	5.3294
		3	62	24.133	9.6	15.667	10.4		14.95	3.34373				3	62	1.2	0.4	0.4	0.733		0.68325	0.18929			3	62	0.4	0	0.4	0		0.2	0.11547
		3	63	25.8	13.333	15.533	41.733		24.0998	6.47517				3	63	2.067	0.733	0.933	9.067		3.2	1.9776			3	63	1.6	0.4	12	1.2		3.8	2.74469
		3	64	20.333	11.933	20.067	20.4		18.1833	2.08466				3	64	1.133	1.6	1.067	1.8		1.4	0.178461			3	64	0.8	0	0	0.4		0.3	0.191485
		3	65	37.6	32.533	54.133	24.533		37.1998	6.25247				3	65	3.8	7	11.067	2		5.96675	1.98977			3	65	34.8	4.4	2.2	7.4		12.2	7.60833
		3	66	23.067	17.2	7.133	11.733		14.7832	3.44349				3	66	2	1.133	0.067	0.4		0.9	0.42897			3	66	0	0.2	0.4	1		0.4	0.216025
		3	67	41.867	35.6	34.867	59.8		43.0335	5.80535				3	67	5.4	8.733	3.6	17.2		8.73325	3.01588			3	67	5.6	6.8	20.6	9.2		10.55	3.43256
		3	68	26.667	7.4	27.6	24.067		21.4335	4.73717				3	68	0.867	0.4	1.533	4.467		1.81675	0.913489			3	68	2	0	0.2	0		0.55	0.485627
		3	69	58.333	56.533	42.933	60		54.4498	3.90363				3	69	12.8	14.267	5.4	17		12.3667	2.47994			3	69	10	12.4	21.2	27.4		17.75	4.01777
		3	70	23.933	42.8	25.467	19.867		28.0168	5.06739				3	70	1.133	7.2	1.6	2.133		3.0165	1.40938			3	70	1	0.6	0.6	0		0.55	0.206155
		3	71	40.333	46.933	55	60		50.5665	4.34524				3	71	2.2	16.467	12.6	17.467		12.1835	3.48936			3	71	20.8	15.8	30.4	5.8		18.2	5.12445
	Genotype	Day	Hours	Animal 1	Animal 2	Animal 3	Animal 4		MEAN	SEM			Genotype	Day	Hours	Animal 1	Animal 2	Animal 3	Animal 4		MEAN	SEM		Genotype	Day	Hours	Animal 1	Animal 2	Animal 3	Animal 4		MEAN	SEM
	WT	1	0	45.8	47.533	53.6	60	baseline	51.7332	3.22322			WT	1	0	3.467	20.533	24.667	41	baseline	22.4168	7.70845		WT	1	0	68.8	46.2	43.8	15.4	baseline	43.55	10.9433
		1	1	48.733	34.067	60	60		50.7	6.14753				1	1	8.4	15.2	29.867	40		23.3667	7.12752			1	1	63.4	38.8	49	13.8		41.25	10.449
		1	2	34.2	60	38.067	46.133		44.6	5.70344				1	2	5.533	31.933	13.267	22.533		18.3165	5.71623			1	2	23.6	96.8	32.8	3.8		39.25	20.1147
		1	3	49.533	46.867	35.467	26.2		39.5168	5.38584				1	3	4.267	20.8	8.333	10.867		11.0667	3.51765			1	3	13.2	48.8	12.8	18.4		23.3	8.59515
		1	4	37.667	44.267	60	60		50.4835	5.65711				1	4	3.533	17.133	33.533	36.6		22.6998	7.68618			1	4	61.6	40	77.6	4.8		46	15.7463
		1	5	18.333	30.333	32.8	32.933		28.5998	3.47406				1	5	1.733	7.8	7.667	15.467		8.16675	2.81471			1	5	23.2	10	18.6	0		12.95	5.11037
		1	6	32.667	51.933	27.067	53		41.1668	6.62688				1	6	3.133	21	7.2	25.6		14.2332	5.38264			1	6	29.4	46.2	9.8	1		21.6	10.1226
		1	7	34.867	30.867	40.8	5.933		28.1167	7.6709				1	7	4.333	10.533	12.133	1		6.99975	2.61315			1	7	0	23.4	18.4	2.6		11.1	5.77379
		1	8	24.8	38.8	29.6	28.933		30.5332	2.95298				1	8	2.6	17.333	10.733	12.4		10.7665	3.06159			1	8	8.6	44.8	11.4	0.4		16.3	9.78247
		1	9	20	35.6	22	22.867		25.1167	3.5456				1	9	1.6	12.733	3	11.733		7.2665	2.88884			1	9	8.4	30.8	2	0.6		10.45	6.99256
		1	10	37.4	12.533	30.8	5.067		21.45	7.58145				1	10	4.867	2.333	8.467	0.533		4.05	1.71985			1	10	0	0	4.4	3.8		2.05	1.18989
		1	11	28.4	45.667	12.533	51.333		34.4832	8.79304				1	11	2.6	16.067	0.6	19.8		9.76675	4.79367			1	11	12.4	17.2	0	8.4		9.5	3.64189
		1	12	29	9.533	37.867	6.8		20.8	7.53585				1	12	5.267	2.067	7.867	0.6		3.95025	1.62905			1	12	0	0.8	8.4	3.4		3.15	1.89451
		1	13	42.133	25	19.4	7.467		23.5	7.20709				1	13	4.2	4.6	2.533	0.6		2.98325	0.911819			1	13	0	2	0.8	9.6		3.1	2.2053
		1	14	24.667	8.467	8.333	41.533		20.75	7.91796				1	14	2.267	0.8	0.733	14.867		4.66675	3.41846			1	14	12.4	0	1	0		3.35	3.02586
		1	15	11.4	40.533	37.6	16.6		26.5333	7.33798				1	15	1.067	9.933	6.867	2.4		5.06675	2.04187			1	15	0.2	17.8	10.6	0		7.15	4.32772
		1	16	30.667	9.867	22.8	7.667		17.7503	5.44794				1	16	2.533	2.2	1.467	0.467		1.66675	0.457716			1	16	0	3.2	0.6	0.6		1.1	0.714143
		1	17	30	45.533	23.733	52.6		37.9665	6.69234				1	17	3.067	16.067	5.2	14.6		9.7335	3.27606			1	17	7.8	35.4	4.2	2.2		12.4	7.75371
		1	18	22.133	28.333	35.867	28.733		28.7665	2.80787				1	18	3.333	7.267	9.333	9.6		7.38325	1.44723			1	18	9.6	4.8	7.6	0		5.5	2.08087
		1	19	25.867	33.2	45.933	37.733		35.6833	4.20103				1	19	2.333	10.667	15.533	15.667		11.05	3.12979			1	19	15	19.6	25.8	0		15.1	5.49818
		1	20	59.933	60	60	60		59.9832	0.01675				1	20	6.067	31.8	35.667	33.4		26.7335	6.93435			1	20	44.2	120.2	75.8	59.2		74.85	16.4364
		1	21	60	60	60	60		60	0				1	21	10	26.333	30	37.933		26.0665	5.87714			1	21	54.2	92	76.8	107.8		82.7	11.4148
		1	22	55.467	60	60	59.267		58.6835	1.086				1	22	11.467	31.867	35.267	32.267		27.717	5.46954			1	22	54.4	106	80.4	45.2		71.5	13.7039
		1	23	60	59.933	60	60		59.9832	0.01675				1	23	18.933	30.4	32.6	41.8		30.9332	4.70066			1	23	66.2	99.6	78.4	52.2		74.1	10.0447
		2	24	28.2	41	30.867	28.4	LD1:1	32.1168	3.02254				2	24	3.533	16.533	5.8	11.867	LD1:1	9.43325	2.94877			2	24	20.2	58.2	9.4	2.6	LD1:1	22.6	12.4075
		2	25	55.133	60	60	60		58.7833	1.21675				2	25	9	32.4	33.733	29.8		26.2332	5.80217			2	25	58.6	107.6	106	31.8		76	18.6077
		2	26	51.267	39.333	49.667	60		50.0667	4.23756				2	26	12.867	16	23.133	36.933		22.2332	5.35002			2	26	67	47.8	49.4	17.4		45.4	10.2969
		2	27	44.733	28.4	46.133	54.133		43.3498	5.39624				2	27	15.6	4.333	17	31.267		17.05	5.5223			2	27	46.4	7	26.4	42		30.45	8.91679
		2	28	30.533	60	26.667	22		34.8	8.5792				2	28	6.4	29.4	5.2	6.333		11.8332	5.86205			2	28	4.6	82.6	1.6	0.6		22.35	20.1013
		2	29	42.733	41.667	42.333	52.6		44.8332	2.59823				2	29	14.933	19.733	16.8	30.933		20.5998	3.58327			2	29	54.4	44	34.8	25.4		39.65	6.21202
		2	30	35.867	17.4	21.8	5.6		20.1667	6.25174				2	30	8.933	4.133	5	0.4		4.6165	1.751			2	30	0	5.6	4.4	5.2		3.8	1.29099
		2	31	45.533	36.133	50.267	50.667		45.65	3.37977				2	31	13.467	15	19.4	25.067		18.2335	2.6018			2	31	39.2	36.2	31	11.4		29.45	6.25053
		2	32	24.8	28.8	36.667	9.267		24.8835	5.75957				2	32	5	11.133	8.667	1.467		6.56675	2.11589			2	32	0	23.4	13.2	1.8		9.6	5.44977
		2	33	41.4	55.333	18.133	34.2		37.2665	7.74047				2	33	16.2	22.133	4.533	17.467		15.0832	3.74095			2	33	22.8	51.4	8.4	15.2		24.45	9.45247
		2	34	32.667	31.733	32.867	32.533		32.45	0.248656				2	34	5.133	9.133	6.267	15.667		9.05	2.36078			2	34	17.8	15.8	7	2.2		10.7	3.67831
		2	35	30.067	11.2	25	25.867		23.0335	4.09672				2	35	7.2	2.467	5.4	11.2		6.56675	1.82659			2	35	9.6	1	4.4	2.6		4.4	1.86726
		2	36	8.467	21.6	25.6	23.333		19.75	3.84912				2	36	0.533	5	7.267	7.8		5.15	1.65437			2	36	10.2	5.2	14.2	0		7.4	3.07788
		2	37	28.867	43.867	11	6.733		22.6167	8.55317				2	37	5.333	17.267	1.133	0.533		6.0665	3.88317			2	37	0	32.8	0	2.2		8.75	8.03342
		2	38	34	19.733	21.533	39.733		28.7497	4.84407				2	38	7.667	2.733	3.533	11.2		6.28325	1.96336			2	38	8.4	0.6	1.2	1.2		2.85	1.8554
		2	39	35.533	36.467	49.467	13.133		33.65	7.54214				2	39	13.067	12.467	12.8	1.667		10.0003	2.78046			2	39	0	21.2	13.2	11		11.35	4.37217
		2	40	32.733	20.133	28.533	40.533		30.483	4.25235				2	40	7.467	2	5	11.067		6.3835	1.92003			2	40	7.6	0.4	3.2	2.8		3.5	1.5
		2	41	33.8	21.533	9.733	28		23.2665	5.16011				2	41	9.867	5.133	1.2	12.133		7.08325	2.44379			2	41	17.8	6.8	0	10.2		8.7	3.7009
		2	42	32.133	60	59.667	27.8		44.9	8.66737				2	42	6.267	29.267	14.133	6.4		14.0168	5.40568			2	42	3.8	77.4	15.8	1		24.5	17.9231
		2	43	25.067	32.8	21	46.467		31.3335	5.60672				2	43	3.2	13.133	1.667	20.4		9.6	4.40657			2	43	28.8	30.6	0.4	0.6		15.1	8.43742
		2	44	20.133	30.6	22.067	27.667		25.1168	2.42742				2	44	2.8	5.267	2.2	7.2		4.36675	1.15424			2	44	8.6	3	2.2	0		3.45	1.83007
		2	45	52.6	46.733	53.933	60		53.3165	2.7219				2	45	14.733	17.667	19.867	30.2		20.6168	3.36304			2	45	44.8	47.2	33	20.2		36.3	6.19919
		2	46	33.4	40.933	36.667	41.733		38.1833	1.9438				2	46	5.533	14.333	11.667	15.733		11.8165	2.25788			2	46	23.6	37.2	17.2	4.8		20.7	6.74364
		2	47	52	60	60	60		58	2				2	47	22	25.733	31.8	36.333		28.9665	3.17912			2	47	69.2	56.6	55.8	38.6		55.05	6.28351
		3	48	38.067	60	46.933	60		51.25	5.3662				3	48	8	32.867	16.6	33.133		22.65	6.22833			3	48	46.4	92.6	29.2	3.6		42.95	18.7406
		3	49	60	60	60	60		60	0				3	49	41.267	31.267	38.6	38.467		37.4002	2.14371			3	49	70.6	82.4	87.4	94.6		83.75	5.04802
		3	50	60	46.867	56.2	60		55.7668	3.09884				3	50	32	21.2	22.867	28.267		26.0835	2.48273			3	50	40.2	48.2	41.4	31.4		40.3	3.45012
		3	51	39.4	50	40.8	26		39.05	4.94461				3	51	15	23.267	11.933	7.267		14.3667	3.36582			3	51	10.4	42.2	11	10.8		18.6	7.86766
		3	52	44.467	34.467	28.667	38.4		36.5003	3.3238				3	52	17.467	13.2	5.6	16.467		13.1835	2.687			3	52	23.4	17	6.6	18.2		16.3	3.519
		3	53	46.2	44.067	34.6	32.6		39.3667	3.38251				3	53	21.667	18.4	10	12.867		15.7335	2.63639			3	53	18.8	43.8	26	8		24.15	7.52213
		3	54	42	22.6	32.4	25.4		30.6	4.32281				3	54	11.667	7.933	6.2	7.733		8.38325	1.161			3	54	7.6	8.8	6.8	4.6		6.95	0.88459
		3	55	28.2	42.933	25.6	36.933		33.4165	3.99207				3	55	9.4	13.8	7.867	19.6		12.6668	2.63096			3	55	29.4	28.6	12.4	13		20.85	4.70983
		3	56	35.067	6.4	35.533	28.867		26.4668	6.85928				3	56	10.467	0.467	8.867	14.4		8.55025	2.93446			3	56	22.2	0	13	4.8		10	4.87237
		3	57	22.333	55.267	42.933	25.667		36.55	7.70082				3	57	2.6	17.867	15.267	10.867		11.6502	3.34476			3	57	12.6	50.6	18.6	0		20.45	10.7714
		3	58	55.467	16.6	36.267	25.267		33.4002	8.3843				3	58	28.867	2	9.733	6.667		11.8168	5.90156			3	58	4.6	0	9.8	23.8		9.55	5.15453
		3	59	32.733	53.067	26.333	15.4		31.8833	7.9161				3	59	5.6	10.533	7.733	1.333		6.29975	1.93935			3	59	0	51	10.4	2.6		16	11.8741
		3	60	9.267	20.4	24.333	38.2		23.05	5.97329				3	60	0.933	4.733	5.4	16.2		6.8165	3.27889			3	60	13.6	7.8	6.8	0		7.05	2.78732
		3	61	55.867	31.933	36.333	24.067		37.05	6.76594				3	61	25.667	3.667	10.133	4.533		11	5.09467			3	61	0.6	12.8	11.6	24.6		12.4	4.90646
		3	62	20.067	24.6	35.4	32.6		28.1668	3.53908				3	62	2.733	3.867	12.733	10.267		7.4	2.43111			3	62	8.6	23.2	16.8	1.8		12.6	4.67832
		3	63	31.133	18.867	32.267	12.4		23.6668	4.82775				3	63	10.133	2.2	7.2	1.6		5.28325	2.04668			3	63	0	6.2	7.8	7.2		5.3	1.79722
		3	64	53.733	36.2	15.667	21.8		31.85	8.46896				3	64	19.8	9.267	2.4	2.4		8.46675	4.10989			3	64	2	22.8	2.6	9.8		9.3	4.83632
		3	65	24.533	47.867	31.333	60		40.9333	8.02471				3	65	3.2	10.4	2.867	30.467		11.7335	6.48175			3	65	50.4	34.8	3.2	1.4		22.45	12.0671
		3	66	27.067	31.2	40.533	11.267		27.5167	6.10496				3	66	5.533	5.933	10.8	1.067		5.83325	1.98926			3	66	0	15.8	11.8	5		8.15	3.51414
		3	67	24.2	17.133	18.467	38.267		24.5168	4.83295				3	67	2.133	1.8	1.867	11.6		4.35	2.41774			3	67	13.4	0.4	1	0		3.7	3.23986
		3	68	31.667	31.667	38.667	38.6		35.1502	2.0111				3	68	9.267	8.4	11.667	12.533		10.4668	0.97557			3	68	9.2	21.4	13.8	5.4		12.45	3.44226
		3	69	33.2	50.133	50.8	38.2		43.0832	4.38532				3	69	4.4	15.8	22	12.733		13.7333	3.6597			3	69	16.2	47.6	32.2	0		24	10.2512
		3	70	48.733	56.933	44.6	43.4		48.4165	3.05998				3	70	18.6	25.133	16.667	18.2		19.65	1.87454			3	70	19.4	77.4	22.8	19		34.65	14.2755
		3	71	52.867	35.867	50.4	53.333		48.1167	4.13364				3	71	28.333	13.067	19.467	27.733		22.15	3.64119			3	71	44.8	33.4	27.4	58.2		40.95	6.78841

## Sheet: Fig5B
Hourly values of time-spent-awake [min/h], TDW [min/h], and locomotor activity [% of mean activity under LD12:12] separate for the 1h-light pulses and 1h-dark pulses during LD1:1 (48h)															Light	Dark
		1h light pulses WAKEFULNESS [min/h]														1h Dark pulses WAKEFULNESS [min/h]
	Mean 2 days	HET						WT							Mean 2 days	HET						WT
	ZT [h]	Animal 1	Animal 2	Animal 3	Animal 4	MEAN	SEM	Animal 1	Animal 2	Animal 3	Animal 4	MEAN	SEM		ZT [h]	Animal 1	Animal 2	Animal 3	Animal 4	MEAN	SEM	Animal 1	Animal 2	Animal 3	Animal 4	MEAN	SEM
	0	19.9665	21.8665	13.3665	22.3665	19.3915	2.07379	19.067	17.6	36.1	29.9335	25.6751	4.43177		1	42.0335	47.7665	49.0335	43.3665	45.55	1.68773	29.9335	55.3	30.533	31.8665	36.9082	6.14388
	2	13.3665	13	13.8665	19.1665	14.8499	1.44979	28.9	24.1665	34.567	44.067	32.9251	4.27933		3	39.8	29.3	41.1	30.067	35.0667	3.12326	20.6335	32.1335	25.6665	31.4	27.4584	2.69541
	4	15.3	10.167	27.2335	17.567	17.5669	3.57469	30.7665	21	24.9665	8.867	21.4	4.634		5	23.6	48.333	36.7665	26.2	33.7249	5.64052	15.4	37.9	23.6665	42.367	29.8334	6.24843
	6	17.9	17.3665	12.8	21.833	17.4749	1.84933	36.1665	22.1665	28.4665	27.0335	28.4582	2.90163		7	18.233	13.2665	41.4	23.1335	24.0083	6.13716	12.7665	27.667	40.867	33.333	28.6584	5.94725
	8	17.8	11.7665	13.5335	26.7	17.45	3.33324	31.1665	28.1665	22.1	43.233	31.1665	4.44224		9	42.1	42	35.3665	33.2	38.1666	2.28536	44	34.7	20.533	29.1665	32.0999	4.92249
	10	13.6665	17.6335	11.6665	25.667	17.1584	3.09538	19.5335	45.6	50.1	29.6	36.2084	7.08815		11	33.8	42.4	57.6	49.567	45.8418	5.07431	42.367	24.9665	19.7335	24.6335	27.9251	4.96033
	12	27.4335	13.6335	20.367	24.767	21.5503	3.01434	33.1335	31.1335	30.367	25.9	30.1335	1.5269		13	47.033	54.933	56.3665	49.3	51.9081	2.22853	49.1	48.433	52.3665	42.9	48.1999	1.96456
	14	25.5	35.1	20.867	26.233	26.925	2.97265	42.5665	48.933	40.6335	41.0665	43.2999	1.92283		15	56.6	53	59.0665	47.7665	54.1082	2.45355	56.6665	47.9335	55.2	52.4335	53.0584	1.9205
	16	26.833	30.3335	29.633	28.033	28.7081	0.78894	44.2	50.5	38.9	33.1335	41.6834	3.70713		17	59.3	59.5335	60	59.4335	59.5667	0.15213	60	60	60	57.5665	59.3916	0.608375
	18	37.8335	35.767	30.0335	36.3	34.9835	1.70714	60	43.1	52.9335	55.6335	52.9168	3.58146		19	55.2665	59.2	56.367	51	55.4584	1.70145	40.0665	39.2	43.4665	42.0665	41.1999	0.964912
	20	28.567	28.0335	21.7665	26.1	26.1167	1.54388	30.2	47.2335	27.667	37.5	35.6501	4.38777		21	57.9	59.9	50.4665	35.3	50.8916	5.57933	42.6	42.867	38.4665	44.4665	42.1	1.27935
	22	21.767	21.5	23.2335	24.5335	22.7585	0.703749	15.5	20	27.1	38.9335	25.3834	5.10893		23	41.967	59.3665	53.433	58.4665	53.3083	3.99947	43.8	39.533	37.9335	36.8665	39.5333	1.52414
		1h light pulses TDW [min/h]														1h Dark pulses TDW [min/h]
	Mean 2 days	HET						WT							Mean 2 days	HET						WT
	ZT [h]	Animal 1	Animal 2	Animal 3	Animal 4	MEAN	SEM	Animal 1	Animal 2	Animal 3	Animal 4	MEAN	SEM		ZT [h]	Animal 1	Animal 2	Animal 3	Animal 4	MEAN	SEM	Animal 1	Animal 2	Animal 3	Animal 4	MEAN	SEM
	0	1.8665	2.3335	0.7665	1.1665	1.53325	0.35046	7.7335	5.8	8.767	7.9335	7.5585	0.627432		1	12.8665	21.667	8.0665	17.3	14.975	2.92064	9.4	20	9.9	14.167	13.3667	2.45618
	2	1.7665	0.9	0.4335	0.8665	0.991625	0.279283	17	5.5665	8	11.167	10.4334	2.47094		3	5.5335	7.0335	6.4	13.1335	8.02512	1.73032	6.4	6.5	6.5665	6.2665	6.43325	0.0652701
	4	0.7335	0.6335	0.8665	5.6665	1.975	1.23142	0.733	4.8665	6.3335	12	5.98325	2.32981		5	5.9	18.6665	5.2	10.2335	10	3.09587	15.5	10.467	5.633	2.533	8.53325	2.83857
	6	1.2665	1.7	1.5335	0.833	1.33325	0.189145	5.2	3.3	8.133	10.7335	6.84163	1.63433		7	1.7335	1.133	1.033	9.267	3.29162	1.99779	11.6	7.3335	10	1.6335	7.64175	2.18752
	8	2.5665	1.0665	0.7335	1.2665	1.40825	0.401426	13.6335	5.6335	3.7	6.7335	7.42512	2.16234		9	4.6335	12.2665	8.1	7.7665	8.19163	1.56668	6.5335	7.7665	2.0335	21.3	9.40837	4.15091
	10	2	2.2	0.6	0.5335	1.33337	0.444697	5.9	17.6	12.4665	3.7335	9.925	3.16096		11	9.4665	9.1	3.1665	16.4	9.53325	2.70616	2.6665	7.4665	1.767	16	6.975	3.25805
	12	2	1.3	1.2665	2.8335	1.85	0.368866	6.0335	6.8335	6.9335	9.8665	7.41675	0.841049		13	9.0335	17.2	8.9	17.3	13.1084	2.39141	9.5665	16.7335	20.9335	21.4665	17.175	2.74814
	14	1.0665	4.6	1	1.9665	2.15825	0.843227	12.0665	19.733	14.167	16.9665	15.7333	1.66876		15	6.8335	24.4	13.7	17.767	15.6751	3.68075	25.1665	19.4	25.6335	32.033	25.5582	2.58208
	16	3.7	4.7	2.033	3	3.35825	0.562859	5.7665	24.7	11.2	22.5	16.0416	4.52491		17	23.067	30.6	10.0665	25.3335	22.2668	4.3621	25.1335	31.8335	36.1665	34.1335	31.8167	2.39711
	18	5.867	8.3335	1.1	5.5335	5.2085	1.50512	22.4335	18.6	23	32.6	24.1584	2.97872		19	16.8335	29.9	7.833	21.2335	18.95	4.59333	15.3	13.8	14.4665	19.267	15.7084	1.22525
	20	2	4.1	1.0665	3.8	2.74162	0.725798	11.9335	21.3	5.4	11.4	12.5084	3.28355		21	4.6665	33.3	11.3335	17.433	16.6833	6.12169	18.3	19.0665	13.4	21.9	18.1666	1.76745
	22	0.933	2.9665	0.8335	2.9	1.90825	0.592288	10.3	6.033	5.6	4.0665	6.49987	1.3351		23	19.7	33.533	8.367	20.333	20.4833	5.14567	11.4335	14.4	13.6335	22.3335	15.4501	2.37902
		1h light pulses ACTIVITY [% of mean 24h LD12:12]														1h Dark pulses ACTIVITY [% of mean 24h LD12:12]
	Mean 2 days	HET						WT							Mean 2 days	HET						WT
	ZT [h]	Animal 1	Animal 2	Animal 3	Animal 4	MEAN	SEM	Animal 1	Animal 2	Animal 3	Animal 4	MEAN	SEM		ZT [h]	Animal 1	Animal 2	Animal 3	Animal 4	MEAN	SEM	Animal 1	Animal 2	Animal 3	Animal 4	MEAN	SEM
	0	8.85004	4.92027	0.849457	0	3.65494	2.03755	67.3181	38.1004	69.6294	9.01913	46.0168	14.2677		1	176.017	185.33	157.999	182.446	175.448	6.13341	107.345	166.079	71.7555	20.7713	91.4876	30.5579
	2	2.95001	3.28018	0	6.11552	3.08643	1.25025	67.9245	25.7259	44.6479	35.5299	43.4571	9.02454		3	142.584	54.9431	142.709	81.5402	105.444	22.1544	29.1105	84.6676	39.3326	7.10598	40.0542	16.3203
	4	0	0	10.1935	0	2.54837	2.54837	72.1698	21.1669	55.8098	0	37.2866	16.3556		5	79.6504	198.451	102.784	63.1937	111.02	30.2537	1.81941	74.2469	30.8283	36.6231	35.8794	14.8835
	6	6.88337	0	1.69891	0	2.14557	1.62924	51.5499	38.7517	47.837	4.09961	35.5595	10.8257		7	13.7667	5.74032	84.9457	8.15402	28.1517	19.0058	0	44.6133	55.8098	24.8709	31.3235	12.244
	8	4.91669	0	0	5.09626	2.50324	1.44571	29.1105	37.7748	15.4141	17.2183	24.8794	5.26368		9	214.368	102.506	55.2147	76.4439	112.133	35.4236	206.806	67.7341	8.50436	15.8518	74.724	45.9578
	10	0	4.10023	3.39783	16.308	5.95152	3.56636	11.5229	151.75	73.3501	8.19921	61.2056	33.6946		11	49.1669	75.4442	165.644	183.465	118.43	33.0454	127.965	50.4749	3.72066	0.819921	45.7451	29.6743
	12	13.7667	0	0.849457	11.2118	6.45699	3.52583	53.9757	39.7286	42.5218	7.37929	35.9014	9.99446		13	117.017	173.03	197.924	197.735	171.426	19.0551	184.973	154.355	173.276	27.604	135.052	36.3672
	14	4.91669	4.10023	3.39783	3.05776	3.86813	0.411424	130.391	186.594	106.304	32.5235	113.953	31.9325		15	170.117	205.831	245.493	152.888	193.582	20.5171	345.687	146.54	221.113	132.281	211.405	48.8144
	16	16.7167	10.6606	14.4408	40.7701	20.6471	6.82295	201.954	245.536	102.584	8.47252	139.637	52.9741		17	367.768	364.92	406.89	556.512	424.023	45.189	391.779	309.362	513.982	172.73	346.963	71.6907
	18	13.7667	15.5809	3.39783	36.6931	17.3596	6.98085	325.067	156.309	241.311	66.6869	197.344	55.5289		19	297.951	255.854	300.708	368.969	305.871	23.4031	172.237	80.1085	99.3947	72.1531	105.973	22.8163
	20	17.7001	13.1207	1.69891	7.13477	9.91362	3.48948	84.9057	162.171	21.7924	25.6909	73.64	32.8531		21	338.268	296.036	220.009	114.156	242.118	49.1724	221.968	142.958	161.583	45.6423	143.038	36.5829
	22	1.96668	7.38041	2.54837	0	2.97386	1.56676	23.0458	23.4464	29.7652	13.392	22.4124	3.37764		23	162.251	337.039	188.58	303.737	247.902	42.7378	208.019	105.509	115.34	33.3435	115.553	35.8344
