# Supplementary material for: Rai1 frees mice from the repression of active wake behaviors by light
Source: eLife. 2017 May 26;6:e23292. doi: 10.7554/eLife.23292 (PMC5464769; doi:10.7554/eLife.23292)
Supplement: Figure 8—source data 1. — For both panels individual data are provided. DOI: http://dx.doi.org/10.7554/eLife.23292.018 [file elife-23292-fig8-data1.xlsx]

## Sheet: Fig8B-a-wave
ERG [microVolt] after 12h dark adaptation; a-wave amplitude
		SCOTOPIC STIMULI green [cds/m2]
eye	mouse	0.0001	0.001	0.01	0.03	0.1	0.3	1	3	10	30
HET
R	Animal1	0	-7.734	-12.19	-0.14	-8.528	-17.66	-26.48	-38.61	-50.03	-58.36
L		0	-4.153	-17.13	-16.44	-30.56	-51.25	-76.39	-118.7	-151.7	-161
R	Animal2	0	-7.513	1.124	-16.33	-48.85	-80.95	-93.76	-132.8	-156.1	-167.3
L		0	-6.212	6.165	-22.41	-50.37	-82.06	-109.7	-159.6	-201.2	-205.6
R	Animal3	0	1.839	-2.23	-12.56	-9.67	-31.76	-22	-44.18	-50.09	-71.59
L		0	9.262	-3.758	-26.04	-32.71	-57.97	-54.94	-82.16	-97.91	-109.7
R	Animal4	0	2.787	-6.757	-26	-43.16	-84.5	-65.96	-104.4	-113.3	-120.4
L		0	-0.114	-8.6	-36.85	-56.71	-106	-91.61	-131.2	-145.1	-151.5
R	Animal5	0	-14.75	-31.99	-58.07	-94.68	-112.7	-122.4	-136.8	-164.1	-146.5
L		0	-15.89	-29.76	-10.37	-28.34	-57.13	-59.93	-77.12	-112.1	-110.7
R	Animal6	0	-5.222	3.303	-25.28	-75.92	-89.18	-142.2	-190.3	-227	-251.9
L		0	1.861	6.482	-25.55	-70.05	-90.5	-135.2	-189.6	-228.4	-257.4
	MEAN	0	-3.81992	-7.94508	-23.0033	-45.7957	-71.805	-83.3808	-117.123	-141.419	-150.996
	SEM	0	2.12262	3.71776	4.20194	7.50946	8.35192	11.4323	14.4901	17.3094	18.2623
WT
R	Animal1	0	-9.324	-29.41	-37.7	-44.5	-74.76	-108.8	-125.8	-148.2	-163.1
L		0	-15.81	-49.18	-85.93	-134.2	-167.5	-212.4	-247.5	-288.6	-283.1
R	Animal2	0	-3.2	-77.37	-28.89	-47.26	-79.64	-83.18	-116.5	-150.8	-153.4
L		0	-3.616	-22.25	-46.45	-84.55	-135	-147.3	-195.1	-251	-257.3
R	Animal3	0	-23.74	-30.28	-66.14	-85.35	-104.1	-128.3	-170.6	-214.5	-211.4
L		0	-26.92	-27.57	-58.76	-73.91	-87.81	-92.23	-169.4	-184.9	-177.5
R	Animal4	0	11.66	-35.07	-67.94	-74.76	-125.6	-129	-162.3	-208.9	-197.2
L		0	7.203	-35.09	-67.17	-66.14	-124.3	-130.1	-174.6	-216.6	-226.6
R	Animal5	0	3.239	-12.06	-59.6	-103.8	-158.1	-239.9	-281.9	-330.4	-341.4
L		0	0.269	-31.36	-57.67	-84.72	-107	-158.8	-173.8	-211.7	-226.6
	MEAN	0	-6.0239	-34.964	-57.625	-79.919	-116.381	-143.001	-181.75	-220.56	-223.76
	SEM	0	4.06067	5.58478	5.18969	8.27608	9.99185	15.7686	15.8776	18.0314	18.2969

## Sheet: Fig8B-b-wave
ERG [microVolt] after 12h dark adaptation; b-wave amplitude
		SCOTOPIC STIMULI green (cds/m2)
eye	mouse	0.0001	0.001	0.01	0.03	0.1	0.3	1	3	10	30
HET
R	Animal1	0	53.68	107.6	95.65	93.02	91.27	143.1	114.7	131.2	184.9
L		0	95.26	112.9	135.8	156.2	158.7	253.8	261	300.8	328.2
R	Animal2	0	111.5	140.3	157.1	175.3	210	253.3	250.1	313.1	252.7
L		0	90.82	104.6	124.1	173.6	206.6	248.8	280.7	351.8	306.4
R	Animal3	0	38.9	122.3	102.9	112.2	146.4	194	174.7	158.9	192
L		0	70.92	154.9	144.4	156.1	199.4	271.5	265.7	227.1	262.1
R	Animal4	0	88.01	161.1	109.3	163.3	204.6	241.4	257.7	229.8	228.9
L		0	106.4	179.3	136.7	202.7	260	309.2	331.1	291.7	288.9
R	Animal5	0	134.3	158.1	290.1	300	280.6	345.2	346.6	391	288.9
L		0	123.5	91.17	135.3	128.6	149.2	181.8	196.2	242.1	225.9
R	Animal6	0	134.2	141.8	153.7	180.1	258.5	348.5	432	447.5	367.8
L		0	123.2	159.2	167.2	187.7	270.8	347.8	424.7	463.4	374.5
	MEAN	0	97.5575	136.106	146.021	169.068	203.006	261.533	277.933	295.7	275.1
	SEM	0	8.9244	8.00772	14.5445	15.0314	16.8706	19.4657	27.3071	30.3311	18.0322
WT
R	Animal1	0	102.8	121	111	110.8	182.7	171.7	289.8	278.7	284.5
L		0	211	229.1	257.6	305.7	409.3	456.4	585	601.9	516.8
R	Animal2	54.16	184.6	171.3	142.9	209.2	227.5	237.7	336	273.9	333.8
L		64.03	233.3	255.7	225.9	326.4	373.1	404.7	529.8	492.3	523.9
R	Animal3	0	168.2	144.6	179.6	269.2	338.7	347.9	437.6	411.4	447.8
L		0	192	170.3	164.5	265.3	334.8	299.6	393.6	340.7	363.1
R	Animal4	0	179	232.2	237.9	275.9	335.8	319	399.3	353.2	367.6
L		0	158.9	235	232.2	266.6	325.7	348.1	438.3	380.8	410.1
R	Animal5	0	218.5	160.6	235.2	387.8	501.8	592.1	684.1	730.1	676.8
L		0	214.9	208.9	247.4	294.1	363	370.2	425.5	437	439.4
	MEAN	11.819	186.32	192.87	203.42	271.1	339.24	354.74	451.9	430	436.38
	SEM	7.9136	11.9318	14.2791	15.8775	23.0967	27.9386	36.6697	37.2174	45.636	35.9707
