# Supplementary material for: Rai1 frees mice from the repression of active wake behaviors by light
Source: eLife. 2017 May 26;6:e23292. doi: 10.7554/eLife.23292 (PMC5464769; doi:10.7554/eLife.23292)
Supplement: Figure 10—source data 1. — For both structures individual data are provided. DOI: http://dx.doi.org/10.7554/eLife.23292.021 [file elife-23292-fig10-data1.xlsx]

## Sheet: Fig10C
number of cFOS-positive cells [values are averages of 2-3 sections, per approximate position (-0.71 or -0.83 mm from bregma), per hemisphere (Left or Right), per ROI (SCN or vSPVZ), per brain]
			SCN										vSPVZ
			-0.71		-0.83		Combined						-0.71		-0.83		Combined
	Condition	Name	Left	Right	Left	Right	Left	Right			Condition	Name	Left	Right	Left	Right	Left	Right
	NO LP WT	Animal1	0	0	0.5	0	0.25	0			NO LP WT	Animal1	1	0	0	0	0.5	0
		Animal2	0.5	0	0	0	0.25	0				Animal2	0.333333	0	2	0.5	1.16667	0.25
		Animal3	0	0	0	0	0	0				Animal3	7	9	2	5	4.5	7
		Mean	0.0833333		0.0833333		0.0833333					Mean	2.88889		1.58333		2.23611
		SEM	0.0833333		0.0833333		0.0527046					SEM	1.64354		0.779066		1.16794
	NO LP HET	Animal4	1	0	0.333333	0.333333	0.666667	0.166667			NO LP HET	Animal4	0	0	2	0	1	0
		Animal5	4	16.5	7	5	5.5	10.75				Animal5	2	6.5	3.5	0	2.75	3.25
		Animal6	0	0	0	0	0	0				Animal6	1.5	4	5	0	3.25	2
		Mean	3.58333		2.11111		2.84722					Mean	2.33333		1.75		2.04167
		SEM	2.65963		1.25806		1.80411					SEM	1.0301		0.873212		0.537807
	LP WT	Animal7	59.3333	42	63.6667	67.6667	61.5	54.8333			LP WT	Animal7	7.33333	6.66667	10.5	18.5	8.91667	12.5833
		Animal8	64.5	67.5	43.3333	38	53.9167	52.75				Animal8	4.33333	1.66667	8.66667	11.3333	6.5	6.5
		Animal9	33.5	42.5	52.5	56	43	49.25				Animal9	1	1.5	1.5	3	1.25	2.25
		Animal10	102	68.3333	45	68.3333	73.5	68.3333				Animal10	7	5.66667	1.66667	3	4.33333	4.33333
		Animal11	50.6667	32.6667	80	63.3333	65.3333	48				Animal11	5	3.66667	3	0.666667	4	2.16667
		Animal12	61.6667	48.3333	72	75	66.8333	61.6667				Animal12	4.33333	1.66667	3	5	3.66667	3.33333
		Mean	56.0833	#REF!	60.4028	#REF!	58.2431	#REF!				Mean	4.15278		5.81944		4.98611
		SEM	5.52674		3.87187		2.6963					SEM	0.658235		1.54757		0.927044
	LP HET	Animal13	31	34.3333	21	24	26	29.1667			LP HET	Animal13	9.33333	14.3333	15	7	12.1667	10.6667
		Animal14	31	33	24.5	16.5	27.75	24.75				Animal14	9	5	8.5	4	8.75	4.5
		Animal15	26	37.5	51	28.75	38.5	33.125				Animal15	5	6	9.5	14.25	7.25	10.125
		Animal16	26	28.6667	43	44.6667	34.5	36.6667				Animal16	4	2	1.66667	3	2.83333	2.5
		Animal17	45.3333	42.6667	38.5	36.5	41.9167	39.5833				Animal17	8.33333	2	13	10.6667	10.6667	6.33333
		Animal18	54.3333	24	64.6667	75	59.5	49.5				Animal18	3.5	5	11.3333	9.33333	7.41667	7.16667
		Animal19	24	36.3333	56	46	40	41.1667				Animal19	6.33333	5	12	9.66667	9.16667	7.33333
		Mean	33.869		40.7202		37.2946					Mean	6.05952		9.20833		7.63393
		SEM	2.35574		4.58169		2.52472					SEM	0.881157		1.08944		0.777995
